# Supplementary material for: A new family of energetic salts based on oxy-bridged bis(dinitromethyl)furazan: syntheses, characterization and properties
Source: Royal Society of Chemistry journal article supplement (doi:10.1039/c5ra00175g), 2015-01-01
Supplement: c5ra00175g1.pdf [file c5ra00175g1.pdf]

## Supporting Information

### **A new family of nitrogen-rich salts based on oxy-bridged bis(dinitromethyl)furazan: syntheses, characterization and properties**

Hui Li, Feng-qi Zhao\*, Bo-zhou Wang, Lian-jie Zhai, Wei-peng Lai and Ning Liu

Science and Technology on Combustion and Explosion Laboratory, Xi'an Modern Chemistry  
Research Institute, Xi'an, Shaanxi 710065, China

Email: [npecc@163.com](mailto:npecc@163.com)

#### **Table of Contents**

- 1. X-ray crystallography**
- 2. Theoretical study**
- 3.  $^1\text{H}$  and  $^{13}\text{C}$  NMR spectra**
- 4. DSC curves**

## 1. X-ray crystallography

Band angles and dihedral angles of the data collection and refinement are given in Table S1, S2, S3 and S4. The details of hydrogen bonds for **4**, **7** and **9** are gathered in Table S5, S6 and S7, respectively.

**Table S1.** Band angles and dihedral angles [°] for the structure of **2**.

|                  |           |                         |           |
|------------------|-----------|-------------------------|-----------|
| C(2)-C(1)-N(2)   | 113.2(3)  | N(2)-C(1)-C(2)-N(3)     | -139.5(3) |
| C(2)-C(1)-N(1)   | 110.8(2)  | N(1)-C(1)-C(2)-N(3)     | 100.3(4)  |
| N(2)-C(1)-N(1)   | 107.0(3)  | N(2)-C(1)-C(2)-C(3)     | 43.9(5)   |
| C(2)-C(1)-H(2)   | 114(2)    | N(1)-C(1)-C(2)-C(3)     | -76.4(4)  |
| N(2)-C(1)-H(2)   | 106(2)    | N(3)-C(2)-C(3)-N(4)     | 0.4(4)    |
| N(1)-C(1)-H(2)   | 104(2)    | C(1)-C(2)-C(3)-N(4)     | 177.3(3)  |
| N(3)-C(2)-C(3)   | 107.8(3)  | N(3)-C(2)-C(3)-O(6)     | -179.4(3) |
| N(3)-C(2)-C(1)   | 119.2(3)  | C(1)-C(2)-C(3)-O(6)     | -2.4(5)   |
| C(3)-C(2)-C(1)   | 133.0(2)  | N(5)-C(4)-C(5)-N(6)     | 0.0(3)    |
| N(4)-C(3)-O(6)   | 126.5(3)  | O(6)-C(4)-C(5)-N(6)     | -179.8(3) |
| N(4)-C(3)-C(2)   | 110.7(2)  | N(5)-C(4)-C(5)-C(6)     | -179.2(3) |
| O(6)-C(3)-C(2)   | 122.8(2)  | O(6)-C(4)-C(5)-C(6)     | 1.0(5)    |
| N(5)-C(4)-O(6)   | 126.3(3)  | N(6)-C(5)-C(6)-N(7)     | -111.8(3) |
| N(5)-C(4)-C(5)   | 110.8(2)  | C(4)-C(5)-C(6)-N(7)     | 67.4(4)   |
| O(6)-C(4)-C(5)   | 122.9(2)  | N(6)-C(5)-C(6)-N(8)     | 128.2(3)  |
| N(6)-C(5)-C(4)   | 107.8(3)  | C(4)-C(5)-C(6)-N(8)     | -52.6(4)  |
| N(6)-C(5)-C(6)   | 120.6(3)  | N(16)-C(7)-C(8)-N(14)   | 131.2(3)  |
| C(4)-C(5)-C(6)   | 131.6(2)  | N(15)-C(7)-C(8)-N(14)   | -109.4(3) |
| C(5)-C(6)-N(7)   | 112.4(2)  | N(16)-C(7)-C(8)-C(9)    | -50.8(4)  |
| C(5)-C(6)-N(8)   | 109.5(2)  | N(15)-C(7)-C(8)-C(9)    | 68.6(4)   |
| N(7)-C(6)-N(8)   | 108.0(3)  | N(14)-C(8)-C(9)-N(13)   | -0.7(3)   |
| C(5)-C(6)-H(1)   | 110.0(19) | C(7)-C(8)-C(9)-N(13)    | -178.8(3) |
| N(7)-C(6)-H(1)   | 107.4(19) | N(14)-C(8)-C(9)-O(17)   | -178.6(3) |
| N(8)-C(6)-H(1)   | 110(2)    | C(7)-C(8)-C(9)-O(17)    | 3.3(5)    |
| C(8)-C(7)-N(16)  | 112.1(2)  | N(12)-C(10)-C(11)-N(11) | 0.5(3)    |
| C(8)-C(7)-N(15)  | 111.9(2)  | O(17)-C(10)-C(11)-N(11) | -177.2(3) |
| N(16)-C(7)-N(15) | 106.3(2)  | N(12)-C(10)-C(11)-C(12) | -179.7(3) |
| C(8)-C(7)-H(4)   | 103(3)    | O(17)-C(10)-C(11)-C(12) | 2.6(5)    |
| N(16)-C(7)-H(4)  | 109(3)    | N(11)-C(11)-C(12)-N(10) | -125.8(3) |
| N(15)-C(7)-H(4)  | 114(3)    | C(10)-C(11)-C(12)-N(10) | 54.4(4)   |
| N(14)-C(8)-C(9)  | 107.9(3)  | N(11)-C(11)-C(12)-N(9)  | 113.6(3)  |
| N(14)-C(8)-C(7)  | 119.6(2)  | C(10)-C(11)-C(12)-N(9)  | -66.2(4)  |
| C(9)-C(8)-C(7)   | 132.5(2)  | N(4)-C(3)-O(6)-C(4)     | -9.1(5)   |
| N(13)-C(9)-O(17) | 126.3(2)  | C(2)-C(3)-O(6)-C(4)     | 170.6(2)  |
| N(13)-C(9)-C(8)  | 111.1(2)  | N(5)-C(4)-O(6)-C(3)     | 8.3(4)    |
| O(17)-C(9)-C(8)  | 122.6(2)  | C(5)-C(4)-O(6)-C(3)     | -172.0(3) |

---

|                   |          |                         |           |
|-------------------|----------|-------------------------|-----------|
| N(12)-C(10)-O(17) | 126.2(3) | N(12)-C(10)-O(17)-C(9)  | -0.2(4)   |
| N(12)-C(10)-C(11) | 111.6(2) | C(11)-C(10)-O(17)-C(9)  | 177.0(3)  |
| O(17)-C(10)-C(11) | 122.1(2) | N(13)-C(9)-O(17)-C(10)  | 8.9(5)    |
| N(11)-C(11)-C(10) | 107.2(3) | C(8)-C(9)-O(17)-C(10)   | -173.5(3) |
| N(11)-C(11)-C(12) | 120.0(3) | C(2)-C(1)-N(1)-O(2)     | 47.6(5)   |
| C(10)-C(11)-C(12) | 132.8(2) | N(2)-C(1)-N(1)-O(2)     | -76.2(4)  |
| C(11)-C(12)-N(10) | 113.4(3) | C(2)-C(1)-N(1)-O(1)     | -127.1(4) |
| C(11)-C(12)-N(9)  | 109.9(2) | N(2)-C(1)-N(1)-O(1)     | 109.0(4)  |
| N(10)-C(12)-N(9)  | 107.7(3) | C(2)-C(1)-N(2)-O(4)     | 31.6(5)   |
| C(11)-C(12)-H(3)  | 107(2)   | N(1)-C(1)-N(2)-O(4)     | 153.9(3)  |
| N(10)-C(12)-H(3)  | 104(2)   | C(2)-C(1)-N(2)-O(3)     | -151.3(4) |
| N(9)-C(12)-H(3)   | 114(2)   | N(1)-C(1)-N(2)-O(3)     | -28.9(5)  |
| N(3)-O(5)-N(4)    | 111.1(2) | C(3)-C(2)-N(3)-O(5)     | 0.3(4)    |
| C(3)-O(6)-C(4)    | 122.0(2) | C(1)-C(2)-N(3)-O(5)     | -177.2(3) |
| N(6)-O(7)-N(5)    | 112.0(2) | N(4)-O(5)-N(3)-C(2)     | -0.8(4)   |
| N(14)-O(16)-N(13) | 111.4(2) | O(6)-C(3)-N(4)-O(5)     | 178.9(3)  |
| C(10)-O(17)-C(9)  | 121.9(2) | C(2)-C(3)-N(4)-O(5)     | -0.8(4)   |
| N(11)-O(18)-N(12) | 112.0(2) | N(3)-O(5)-N(4)-C(3)     | 1.0(4)    |
| O(2)-N(1)-O(1)    | 124.6(4) | O(6)-C(4)-N(5)-O(7)     | 179.6(3)  |
| O(2)-N(1)-C(1)    | 116.9(3) | C(5)-C(4)-N(5)-O(7)     | -0.2(3)   |
| O(1)-N(1)-C(1)    | 118.3(4) | N(6)-O(7)-N(5)-C(4)     | 0.3(3)    |
| O(4)-N(2)-O(3)    | 127.5(4) | C(4)-C(5)-N(6)-O(7)     | 0.1(3)    |
| O(4)-N(2)-C(1)    | 115.8(3) | C(6)-C(5)-N(6)-O(7)     | 179.5(3)  |
| O(3)-N(2)-C(1)    | 116.7(3) | N(5)-O(7)-N(6)-C(5)     | -0.3(3)   |
| C(2)-N(3)-O(5)    | 106.1(3) | C(5)-C(6)-N(7)-O(8)     | -26.0(5)  |
| C(3)-N(4)-O(5)    | 104.4(2) | N(8)-C(6)-N(7)-O(8)     | 94.9(4)   |
| C(4)-N(5)-O(7)    | 103.4(2) | C(5)-C(6)-N(7)-O(11)    | 154.5(5)  |
| C(5)-N(6)-O(7)    | 106.0(3) | N(8)-C(6)-N(7)-O(11)    | -84.6(5)  |
| O(8)-N(7)-O(11)   | 125.0(4) | C(5)-C(6)-N(8)-O(9)     | -58.3(4)  |
| O(8)-N(7)-C(6)    | 118.1(3) | N(7)-C(6)-N(8)-O(9)     | 179.0(3)  |
| O(11)-N(7)-C(6)   | 116.9(3) | C(5)-C(6)-N(8)-O(10)    | 119.3(4)  |
| O(9)-N(8)-O(10)   | 125.5(4) | N(7)-C(6)-N(8)-O(10)    | -3.3(5)   |
| O(9)-N(8)-C(6)    | 115.3(3) | C(11)-C(12)-N(9)-O(22)  | -75.8(7)  |
| O(10)-N(8)-C(6)   | 119.2(4) | N(10)-C(12)-N(9)-O(22)  | 160.2(7)  |
| O(22)-N(9)-O(21)  | 125.9(5) | C(11)-C(12)-N(9)-O(21)  | 101.0(5)  |
| O(22)-N(9)-C(12)  | 115.5(5) | N(10)-C(12)-N(9)-O(21)  | -22.9(5)  |
| O(21)-N(9)-C(12)  | 118.6(4) | C(11)-C(12)-N(10)-O(19) | -8.7(4)   |
| O(19)-N(10)-O(20) | 124.8(3) | N(9)-C(12)-N(10)-O(19)  | 113.2(4)  |
| O(19)-N(10)-C(12) | 118.5(3) | C(11)-C(12)-N(10)-O(20) | 166.1(4)  |
| O(20)-N(10)-C(12) | 116.5(3) | N(9)-C(12)-N(10)-O(20)  | -72.1(4)  |
| C(11)-N(11)-O(18) | 105.9(2) | C(10)-C(11)-N(11)-O(18) | -0.5(3)   |
| C(10)-N(12)-O(18) | 103.2(2) | C(12)-C(11)-N(11)-O(18) | 179.6(3)  |
| C(9)-N(13)-O(16)  | 103.7(2) | N(12)-O(18)-N(11)-C(11) | 0.4(4)    |
| C(8)-N(14)-O(16)  | 105.9(2) | O(17)-C(10)-N(12)-O(18) | 177.3(3)  |

---

|                        |           |                         |          |
|------------------------|-----------|-------------------------|----------|
| O(13)-N(15)-O(12)      | 127.6(3)  | C(11)-C(10)-N(12)-O(18) | -0.2(3)  |
| O(13)-N(15)-C(7)       | 116.5(2)  | N(11)-O(18)-N(12)-C(10) | -0.1(3)  |
| O(12)-N(15)-C(7)       | 115.8(3)  | O(17)-C(9)-N(13)-O(16)  | 178.2(3) |
| O(15)-N(16)-O(14)      | 126.7(3)  | C(8)-C(9)-N(13)-O(16)   | 0.4(3)   |
| O(15)-N(16)-C(7)       | 115.6(3)  | N(14)-O(16)-N(13)-C(9)  | 0.0(3)   |
| O(14)-N(16)-C(7)       | 117.7(3)  | C(9)-C(8)-N(14)-O(16)   | 0.6(3)   |
| N(16)-C(7)-N(15)-O(12) | -97.4(3)  | C(7)-C(8)-N(14)-O(16)   | 179.0(2) |
| C(8)-C(7)-N(16)-O(15)  | -33.3(4)  | N(13)-O(16)-N(14)-C(8)  | -0.4(3)  |
| N(15)-C(7)-N(16)-O(15) | -155.9(3) | C(8)-C(7)-N(15)-O(13)   | -39.2(4) |
| C(8)-C(7)-N(16)-O(14)  | 148.4(3)  | N(16)-C(7)-N(15)-O(13)  | 83.6(3)  |
| N(15)-C(7)-N(16)-O(14) | 25.8(4)   | C(8)-C(7)-N(15)-O(12)   | 139.9(3) |

**Table S2.** Band angles and dihedral angles [°] for the structure of **4**.

|                     |            |                     |             |
|---------------------|------------|---------------------|-------------|
| O(1)-N(1)-O(2)      | 122.50(16) | C(2)-N(3)-O(5)-N(4) | -0.5(2)     |
| O(1)-N(1)-C(1)      | 122.11(17) | C(3)-N(4)-O(5)-N(3) | 0.19(19)    |
| O(2)-N(1)-C(1)      | 115.40(16) | C(5)-N(6)-O(7)-N(5) | 0.3(2)      |
| O(3)-N(2)-O(4)      | 120.74(16) | C(4)-N(5)-O(7)-N(6) | 0.3(2)      |
| O(3)-N(2)-C(1)      | 123.14(16) | O(3)-N(2)-C(1)-N(1) | 5.1(3)      |
| O(4)-N(2)-C(1)      | 116.10(16) | O(4)-N(2)-C(1)-N(1) | -173.45(16) |
| C(2)-N(3)-O(5)      | 105.77(16) | O(3)-N(2)-C(1)-C(2) | 176.66(16)  |
| C(3)-N(4)-O(5)      | 103.68(15) | O(4)-N(2)-C(1)-C(2) | -1.9(2)     |
| C(4)-N(5)-O(7)      | 104.01(15) | O(1)-N(1)-C(1)-N(2) | -8.1(3)     |
| C(5)-N(6)-O(7)      | 106.09(17) | O(2)-N(1)-C(1)-N(2) | 171.70(17)  |
| O(8)-N(7)-O(9)      | 121.74(16) | O(1)-N(1)-C(1)-C(2) | -179.72(16) |
| O(8)-N(7)-C(6)      | 123.71(16) | O(2)-N(1)-C(1)-C(2) | 0.1(2)      |
| O(9)-N(7)-C(6)      | 114.55(15) | O(5)-N(3)-C(2)-C(3) | 0.6(2)      |
| O(10)-N(8)-O(11)    | 120.09(16) | O(5)-N(3)-C(2)-C(1) | -175.90(16) |
| O(10)-N(8)-C(6)     | 122.98(16) | N(2)-C(1)-C(2)-N(3) | 78.6(2)     |
| O(11)-N(8)-C(6)     | 116.89(17) | N(1)-C(1)-C(2)-N(3) | -109.4(2)   |
| H(9A)-N(9)-H(9B)    | 100(3)     | N(2)-C(1)-C(2)-C(3) | -97.0(2)    |
| H(9A)-N(9)-H(9C)    | 106(3)     | N(1)-C(1)-C(2)-C(3) | 75.0(2)     |
| H(9B)-N(9)-H(9C)    | 115(3)     | O(5)-N(4)-C(3)-O(6) | 178.17(17)  |
| H(9A)-N(9)-H(9D)    | 105(3)     | O(5)-N(4)-C(3)-C(2) | 0.19(19)    |
| H(9C)-N(9)-H(9D)    | 111(3)     | C(4)-O(6)-C(3)-N(4) | 12.9(3)     |
| H(10D)-N(10)-H(10C) | 115(3)     | C(4)-O(6)-C(3)-C(2) | -169.34(17) |
| H(10D)-N(10)-H(10B) | 119(3)     | N(3)-C(2)-C(3)-N(4) | -0.5(2)     |
| H(10C)-N(10)-H(10B) | 105(3)     | C(1)-C(2)-C(3)-N(4) | 175.62(18)  |
| H(10D)-N(10)-H(10A) | 110(5)     | N(3)-C(2)-C(3)-O(6) | -178.61(17) |
| H(10C)-N(10)-H(10A) | 115(4)     | C(1)-C(2)-C(3)-O(6) | -2.5(3)     |
| H(10B)-N(10)-H(1A)  | 90(4)      | O(7)-N(5)-C(4)-O(6) | 178.53(18)  |
| N(3)-O(5)-N(4)      | 111.51(13) | O(7)-N(5)-C(4)-C(5) | -0.7(2)     |
| C(4)-O(6)-C(3)      | 121.33(15) | C(3)-O(6)-C(4)-N(5) | 5.6(3)      |
| N(6)-O(7)-N(5)      | 111.37(15) | C(3)-O(6)-C(4)-C(5) | -175.27(17) |
| N(2)-C(1)-N(1)      | 123.02(17) | O(7)-N(6)-C(5)-C(4) | -0.7(2)     |

|                |            |                      |             |
|----------------|------------|----------------------|-------------|
| N(2)-C(1)-C(2) | 118.48(16) | O(7)-N(6)-C(5)-C(6)  | 177.70(17)  |
| N(1)-C(1)-C(2) | 117.98(17) | N(5)-C(4)-C(5)-N(6)  | 0.9(2)      |
| N(3)-C(2)-C(3) | 107.59(17) | O(6)-C(4)-C(5)-N(6)  | -178.35(18) |
| N(3)-C(2)-C(1) | 122.35(17) | N(5)-C(4)-C(5)-C(6)  | -177.32(19) |
| C(3)-C(2)-C(1) | 129.95(16) | O(6)-C(4)-C(5)-C(6)  | 3.4(3)      |
| N(4)-C(3)-O(6) | 126.32(17) | O(10)-N(8)-C(6)-N(7) | 1.1(3)      |
| N(4)-C(3)-C(2) | 111.45(16) | O(11)-N(8)-C(6)-N(7) | -176.62(16) |
| O(6)-C(3)-C(2) | 122.20(16) | O(10)-N(8)-C(6)-C(5) | 179.89(17)  |
| N(5)-C(4)-O(6) | 126.99(17) | O(11)-N(8)-C(6)-C(5) | 2.2(3)      |
| N(5)-C(4)-C(5) | 111.07(17) | O(8)-N(7)-C(6)-N(8)  | -7.0(3)     |
| O(6)-C(4)-C(5) | 121.93(16) | O(9)-N(7)-C(6)-N(8)  | 173.23(16)  |
| N(6)-C(5)-C(4) | 107.45(17) | O(8)-N(7)-C(6)-C(5)  | 174.22(17)  |
| N(6)-C(5)-C(6) | 122.59(17) | O(9)-N(7)-C(6)-C(5)  | -5.6(2)     |
| C(4)-C(5)-C(6) | 129.93(17) | N(6)-C(5)-C(6)-N(8)  | 77.8(3)     |
| N(8)-C(6)-N(7) | 122.50(17) | C(4)-C(5)-C(6)-N(8)  | -104.2(2)   |
| N(8)-C(6)-C(5) | 119.87(17) | N(6)-C(5)-C(6)-N(7)  | -103.4(2)   |
| N(7)-C(6)-C(5) | 117.61(16) | C(4)-C(5)-C(6)-N(7)  | 74.6(3)     |

**Table S3.** Band angles and dihedral angles [°] for the structure of **7**.

|                     |            |                     |             |
|---------------------|------------|---------------------|-------------|
| O(2)-N(1)-O(1)      | 121.17(16) | C(2)-N(3)-O(5)-N(4) | 0.2(3)      |
| O(2)-N(1)-C(1)      | 117.46(16) | C(3)-N(4)-O(5)-N(3) | 0.0(2)      |
| O(1)-N(1)-C(1)      | 121.34(15) | C(5)-N(6)-O(7)-N(5) | 0.80(19)    |
| O(3)-N(2)-O(4)      | 121.69(16) | C(4)-N(5)-O(7)-N(6) | -0.76(19)   |
| O(3)-N(2)-C(1)      | 122.44(16) | O(2)-N(1)-C(1)-N(2) | -176.74(18) |
| O(4)-N(2)-C(1)      | 115.87(15) | O(1)-N(1)-C(1)-N(2) | 1.2(3)      |
| C(2)-N(3)-O(5)      | 106.07(16) | O(2)-N(1)-C(1)-C(2) | 5.1(3)      |
| C(3)-N(4)-O(5)      | 103.34(15) | O(1)-N(1)-C(1)-C(2) | -176.97(18) |
| C(4)-N(5)-O(7)      | 103.26(14) | O(3)-N(2)-C(1)-N(1) | -20.3(3)    |
| C(5)-N(6)-O(7)      | 106.02(14) | O(4)-N(2)-C(1)-N(1) | 160.62(18)  |
| O(8)-N(7)-O(9)      | 119.61(15) | O(3)-N(2)-C(1)-C(2) | 157.96(19)  |
| O(8)-N(7)-C(6)      | 123.39(15) | O(4)-N(2)-C(1)-C(2) | -21.1(3)    |
| O(9)-N(7)-C(6)      | 116.98(14) | O(5)-N(3)-C(2)-C(3) | -0.3(2)     |
| O(11)-N(8)-O(10)    | 120.54(16) | O(5)-N(3)-C(2)-C(1) | 177.77(19)  |
| O(11)-N(8)-C(6)     | 117.16(15) | N(1)-C(1)-C(2)-N(3) | -44.3(3)    |
| O(10)-N(8)-C(6)     | 122.31(15) | N(2)-C(1)-C(2)-N(3) | 137.5(2)    |
| C(7)-N(9)-H(9A)     | 120.0      | N(1)-C(1)-C(2)-C(3) | 133.4(2)    |
| C(7)-N(9)-H(9B)     | 120.0      | N(2)-C(1)-C(2)-C(3) | -44.8(3)    |
| H(9A)-N(9)-H(9B)    | 120.0      | O(5)-N(4)-C(3)-O(6) | -175.8(2)   |
| C(7)-N(10)-H(10A)   | 120.0      | O(5)-N(4)-C(3)-C(2) | -0.2(2)     |
| C(7)-N(10)-H(10B)   | 120.0      | C(4)-O(6)-C(3)-N(4) | -25.6(3)    |
| H(10A)-N(10)-H(10B) | 120.0      | C(4)-O(6)-C(3)-C(2) | 159.13(19)  |
| C(7)-N(11)-H(11A)   | 120.0      | N(3)-C(2)-C(3)-N(4) | 0.3(2)      |
| C(7)-N(11)-H(11B)   | 120.0      | C(1)-C(2)-C(3)-N(4) | -177.76(18) |
| H(11A)-N(11)-H(11B) | 120.0      | N(3)-C(2)-C(3)-O(6) | 176.30(19)  |

|                     |            |                      |             |
|---------------------|------------|----------------------|-------------|
| C(8)-N(12)-H(12A)   | 120.0      | C(1)-C(2)-C(3)-O(6)  | -1.8(3)     |
| C(8)-N(12)-H(12B)   | 120.0      | O(7)-N(5)-C(4)-O(6)  | 179.55(18)  |
| H(12A)-N(12)-H(12B) | 120.0      | O(7)-N(5)-C(4)-C(5)  | 0.4(2)      |
| C(8)-N(13)-H(13A)   | 120.0      | C(3)-O(6)-C(4)-N(5)  | 21.4(3)     |
| C(8)-N(13)-H(13B)   | 120.0      | C(3)-O(6)-C(4)-C(5)  | -159.60(18) |
| H(13A)-N(13)-H(13B) | 120.0      | O(7)-N(6)-C(5)-C(4)  | -0.49(19)   |
| C(8)-N(14)-H(14A)   | 120.0      | O(7)-N(6)-C(5)-C(6)  | 177.56(15)  |
| C(8)-N(14)-H(14B)   | 120.0      | N(5)-C(4)-C(5)-N(6)  | 0.0(2)      |
| H(14A)-N(14)-H(14B) | 120.0      | O(6)-C(4)-C(5)-N(6)  | -179.14(18) |
| N(3)-O(5)-N(4)      | 111.58(14) | N(5)-C(4)-C(5)-C(6)  | -177.95(17) |
| C(3)-O(6)-C(4)      | 124.64(14) | O(6)-C(4)-C(5)-C(6)  | 2.9(3)      |
| N(6)-O(7)-N(5)      | 111.49(12) | O(8)-N(7)-C(6)-N(8)  | -5.4(3)     |
| N(1)-C(1)-N(2)      | 121.19(15) | O(9)-N(7)-C(6)-N(8)  | 173.45(16)  |
| N(1)-C(1)-C(2)      | 121.61(15) | O(8)-N(7)-C(6)-C(5)  | 176.56(16)  |
| N(2)-C(1)-C(2)      | 117.17(15) | O(9)-N(7)-C(6)-C(5)  | -4.6(2)     |
| N(3)-C(2)-C(3)      | 107.11(16) | O(11)-N(8)-C(6)-N(7) | -173.03(17) |
| N(3)-C(2)-C(1)      | 126.85(17) | O(10)-N(8)-C(6)-N(7) | 7.6(3)      |
| C(3)-C(2)-C(1)      | 126.01(16) | O(11)-N(8)-C(6)-C(5) | 5.0(3)      |
| N(4)-C(3)-O(6)      | 128.07(17) | O(10)-N(8)-C(6)-C(5) | -174.39(17) |
| N(4)-C(3)-C(2)      | 111.90(16) | N(6)-C(5)-C(6)-N(7)  | 131.43(19)  |
| O(6)-C(3)-C(2)      | 119.89(15) | C(4)-C(5)-C(6)-N(7)  | -50.9(3)    |
| N(5)-C(4)-O(6)      | 126.76(16) | N(6)-C(5)-C(6)-N(8)  | -46.6(3)    |
| N(5)-C(4)-C(5)      | 111.87(16) | C(4)-C(5)-C(6)-N(8)  | 131.02(19)  |
| O(6)-C(4)-C(5)      | 121.37(15) | N(8)-C(6)-C(5)       | 120.18(15)  |
| N(6)-C(5)-C(4)      | 107.36(16) | N(11)-C(7)-N(9)      | 120.03(18)  |
| N(6)-C(5)-C(6)      | 124.84(16) | N(11)-C(7)-N(10)     | 120.34(19)  |
| C(4)-C(5)-C(6)      | 127.77(15) | N(9)-C(7)-N(10)      | 119.64(19)  |
| N(7)-C(6)-N(8)      | 121.02(15) | N(13)-C(8)-N(14)     | 120.31(16)  |
| N(7)-C(6)-C(5)      | 118.77(15) | N(13)-C(8)-N(12)     | 119.85(16)  |
| N(14)-C(8)-N(12)    | 119.84(16) |                      |             |

**Table S4.** Band angles and dihedral angles [ $^{\circ}$ ] for the structure of **9**.

|                  |          |                     |          |
|------------------|----------|---------------------|----------|
| O(2)-N(1)-O(1)   | 120.5(3) | C(2)-N(3)-O(5)-N(4) | 0.5(4)   |
| O(2)-N(1)-C(1)   | 123.3(3) | C(3)-N(4)-O(5)-N(3) | -0.5(4)  |
| O(1)-N(1)-C(1)   | 116.2(3) | O(2)-N(1)-C(1)-N(2) | -8.8(4)  |
| O(3)-N(2)-O(4)   | 121.0(3) | O(1)-N(1)-C(1)-N(2) | 173.7(3) |
| O(3)-N(2)-C(1)   | 121.5(3) | O(2)-N(1)-C(1)-C(2) | 168.1(3) |
| O(4)-N(2)-C(1)   | 117.5(3) | O(1)-N(1)-C(1)-C(2) | -9.5(4)  |
| C(2)-N(3)-O(5)   | 106.4(3) | O(3)-N(2)-C(1)-N(1) | -17.9(4) |
| C(3)-N(4)-O(5)   | 104.6(3) | O(4)-N(2)-C(1)-N(1) | 163.4(3) |
| C(4)-N(5)-H(5A)  | 120.0    | O(3)-N(2)-C(1)-C(2) | 165.3(3) |
| C(4)-N(5)-H(5B)  | 120.0    | O(4)-N(2)-C(1)-C(2) | -13.5(4) |
| H(5A)-N(5)-H(5B) | 120.0    | O(5)-N(3)-C(2)-C(3) | -0.2(4)  |
| C(4)-N(6)-H(6A)  | 120.0    | O(5)-N(3)-C(2)-C(1) | 177.4(3) |

|                  |          |                       |           |
|------------------|----------|-----------------------|-----------|
| C(4)-N(6)-H(6B)  | 120.0    | N(1)-C(1)-C(2)-N(3)   | 135.1(3)  |
| H(6A)-N(6)-H(6B) | 120.0    | N(2)-C(1)-C(2)-N(3)   | -48.0(4)  |
| C(4)-N(7)-C(5)   | 125.3(3) | N(1)-C(1)-C(2)-C(3)   | -47.9(5)  |
| C(5)-N(8)-H(8A)  | 120.0    | O(5)-N(4)-C(3)-C(2)   | 0.4(4)    |
| C(5)-N(8)-H(8B)  | 120.0    | C(3)#1-O(6)-C(3)-N(4) | 8.9(3)    |
| H(8A)-N(8)-H(8B) | 120.0    | C(3)#1-O(6)-C(3)-C(2) | -171.1(4) |
| C(5)-N(9)-H(9A)  | 120.0    | N(3)-C(2)-C(3)-N(4)   | -0.1(4)   |
| C(5)-N(9)-H(9B)  | 120.0    | C(1)-C(2)-C(3)-N(4)   | -177.4(3) |
| H(9A)-N(9)-H(9B) | 120.0    | N(3)-C(2)-C(3)-O(6)   | 179.9(3)  |
| N(3)-O(5)-N(4)   | 111.2(2) | C(1)-C(2)-C(3)-O(6)   | 2.6(6)    |
| C(3)-O(6)-C(3)#1 | 121.0(3) | C(5)-N(7)-C(4)-N(6)   | -152.2(3) |
| N(1)-C(1)-N(2)   | 121.6(3) | C(5)-N(7)-C(4)-N(5)   | 31.1(5)   |
| N(1)-C(1)-C(2)   | 119.0(3) | C(4)-N(7)-C(5)-N(8)   | -165.1(3) |
| N(2)-C(1)-C(2)   | 119.3(3) | C(4)-N(7)-C(5)-N(9)   | 18.0(5)   |
| N(3)-C(2)-C(3)   | 107.7(3) | N(6)-C(4)-N(5)        | 117.9(3)  |
| N(3)-C(2)-C(1)   | 121.0(3) | N(6)-C(4)-N(7)        | 116.9(3)  |
| C(3)-C(2)-C(1)   | 131.2(3) | N(5)-C(4)-N(7)        | 125.2(3)  |
| N(4)-C(3)-O(6)   | 125.9(3) | N(8)-C(5)-N(9)        | 118.6(3)  |
| N(4)-C(3)-C(2)   | 110.1(3) | N(8)-C(5)-N(7)        | 117.0(3)  |
| O(6)-C(3)-C(2)   | 124.0(3) | N(9)-C(5)-N(7)        | 124.3(3)  |

**Table S5.** Hydrogen bonds present in **4**

| D-H      | d(D-H) [nm] | d(H..A) [nm] | <DHA<br>[°] | d(D..A) [nm] | A   | Symmetry code  |
|----------|-------------|--------------|-------------|--------------|-----|----------------|
| N9-H9A   | 0.0930      | 0.2146       | 148.99      | 0.2981       | O10 | -              |
| N9-H9A   | 0.0930      | 0.2443       | 136.61      | 0.3184       | O11 | -              |
| N9-H9A   | 0.0930      | 0.2631       | 150.63      | 0.3471       | N8  | -              |
| N9-H9B   | 0.0945      | 0.1963       | 162.56      | 0.2879       | O4  | -x+1,-y+2,-z+1 |
| N9-H9C   | 0.0919      | 0.2155       | 151.07      | 0.2993       | O8  | -x,-y+1,-z+1   |
| N9-H9C   | 0.0919      | 0.2237       | 135.48      | 0.2963       | O10 | -x,-y+1,-z+1   |
| N9-H9D   | 0.0965      | 0.2189       | 153.46      | 0.3083       | O3  | x,y-1,z        |
| N9-H9D   | 0.0965      | 0.2208       | 120.31      | 0.2820       | O2  | -x+1,-y+1,-z+1 |
| N10-H10D | 0.1014      | 0.2028       | 152.21      | 0.2963       | O1  | -x+1,-y+1,-z+1 |
| N10-H10D | 0.1014      | 0.2545       | 120.13      | 0.3177       | O9  | x,y-1,z        |
| N10-H10C | 0.0881      | 0.2327       | 146.67      | 0.3101       | N5  | -x+1,-y+1,-z   |
| N10-H10C | 0.0881      | 0.2531       | 118.14      | 0.3047       | N4  | -x+1,-y+1,-z   |
| N10-H10B | 0.0979      | 0.1903       | 172.36      | 0.2876       | O11 | -              |
| N10-H10A | 0.0810      | 0.2209       | 160.16      | 0.2984       | O9  | -x,-y+1,-z     |
| N10-H10A | 0.0810      | 0.2376       | 121.88      | 0.2887       | O5  | x-1,y-1,z      |

**Table S6.** Hydrogen bonds present in **7**

| D-H    | d(D-H) [nm] | d(H..A) [nm] | <DHA<br>[°] | d(D..A) [nm] | A  | Symmetry code |
|--------|-------------|--------------|-------------|--------------|----|---------------|
| N9-H9A | 0.0860      | 0.2085       | 152.56      | 0.2876       | O3 | -x,-y+1,-z+1  |

|          |        |        |        |        |     |                |
|----------|--------|--------|--------|--------|-----|----------------|
| N9-H9B   | 0.0860 | 0.2292 | 146.97 | 0.3049 | O10 | -              |
| N9-H9B   | 0.0860 | 0.2389 | 152.84 | 0.3179 | O11 | -              |
| N9-H9B   | 0.0860 | 0.2688 | 164.19 | 0.3523 | N8  | -              |
| N10-H10A | 0.0860 | 0.2238 | 173.34 | 0.3094 | O9  | x,y-1,z        |
| N10-H10B | 0.0860 | 0.2461 | 149.62 | 0.3232 | O11 | -              |
| N10-H10B | 0.0860 | 0.2550 | 113.46 | 0.2998 | O5  | -x+1,-y+1,-z   |
| N11-H11A | 0.0860 | 0.2225 | 145.74 | 0.2975 | O1  | -x,-y+1,-z+1   |
| N11-H11A | 0.0860 | 0.2283 | 144.36 | 0.3024 | O3  | -x,-y+1,-z+1   |
| N11-H11B | 0.0860 | 0.2060 | 165.18 | 0.2900 | O8  | x,y-1,z        |
| N12-H12A | 0.0860 | 0.2358 | 138.83 | 0.3058 | O10 | -x+1,-y+1,-z+1 |
| N12-H12A | 0.0860 | 0.2482 | 135.04 | 0.3150 | O9  | -              |
| N12-H12B | 0.0860 | 0.2305 | 145.53 | 0.3053 | N3  | -x+1,-y+2,-z   |
| N12-H12B | 0.0860 | 0.2628 | 130.80 | 0.3256 | O4  | x+1,y,z        |
| N13-H13A | 0.0860 | 0.2147 | 146.24 | 0.2902 | O1  | x+1,y-1,z      |
| N13-H13B | 0.0860 | 0.2195 | 149.67 | 0.2969 | O8  | -x+1,-y+1,-z+1 |
| N13-H13B | 0.0860 | 0.2288 | 140.71 | 0.3003 | O10 | -x+1,-y+1,-z+1 |
| N14-H14A | 0.0860 | 0.2321 | 151.60 | 0.3105 | O2  | x+1,y-1,z      |
| N14-H14A | 0.0860 | 0.2663 | 117.04 | 0.3149 | N5  | -x+2,-y+1,-z   |
| N14-H14B | 0.0860 | 0.2378 | 136.28 | 0.3058 | O4  | x+1,y,z        |
| N14-H14B | 0.0860 | 0.2597 | 130.54 | 0.3223 | O2  | -x+1,-y+2,-z   |
| N14-H14B | 0.0860 | 0.2656 | 118.72 | 0.3161 | O7  | -x+2,-y+1,-z   |

**Table S7.** Hydrogen bonds present in **9**

| D-H    | d(D-H) [nm] | d(H..A) [nm] | <DHA<br>[°] | d(D..A) [nm] | A  | Symmetry code         |
|--------|-------------|--------------|-------------|--------------|----|-----------------------|
| N5-H5A | 0.0860      | 0.2460       | 148.83      | 0.3227       | O2 | -x+1/2, -y+3/2, z+1/2 |
| N5-H5B | 0.0860      | 0.2363       | 157.11      | 0.3173       | N4 | -x+1/2, -y+1/2, z+1/2 |
| N5-H5B | 0.0860      | 0.2539       | 110.45      | 0.2952       | N9 |                       |
| N5-H5B | 0.0860      | 0.2576       | 146.86      | 0.3329       | O5 | -x+1/2, -y+1/2, z+1/2 |
| N6-H6A | 0.0860      | 0.2279       | 149.64      | 0.3052       | O1 | -x+1/2, -y+3/2, z+1/2 |
| N6-H6A | 0.0860      | 0.2340       | 153.91      | 0.3135       | O2 | -x+1/2, -y+3/2, z+1/2 |
| N6-H6A | 0.0860      | 0.2648       | 174.87      | 0.3506       | N1 | -x+1/2, -y+3/2, z+1/2 |
| N6-H6B | 0.0860      | 0.2253       | 130.50      | 0.2887       | O4 | -x+1/2, y-1/2, z+1    |
| N8-H8A | 0.0860      | 0.2169       | 147.81      | 0.2933       | O3 | -x+1/2, y-3/2, z+1    |
| N8-H8A | 0.0860      | 0.2243       | 137.67      | 0.2937       | O2 | -x+1/2, y-3/2, z+1    |
| N8-H8B | 0.0860      | 0.2100       | 177.55      | 0.2959       | N7 | -x, -y, -z+2          |
| N9-H9A | 0.0860      | 0.2629       | 134.47      | 0.3289       | O3 | -x+1/2, y-3/2, z+1    |
| N9-H9B | 0.0860      | 0.2245       | 153.33      | 0.3039       | O1 | x, -y+1, z+1/2        |
| N9-H9B | 0.0860      | 0.2475       | 115.70      | 0.2952       | N5 |                       |

## 2. Theoretical study

Computations were performed with the Gaussian 09 (Revision B. 01) suite of programs.<sup>1</sup> The geometric optimization of the structures and frequency analyses were carried out using B3LYP functional with the 6-31+G\*\* basis set, and single-point energies were calculated at the



MP2(full)/6-311++G\*\* level. All of the optimized structures were characterized to be true local energy minima on the potential-energy surface without imaginary frequencies.

### Geometry coordinates

The optimized structure of the following structure

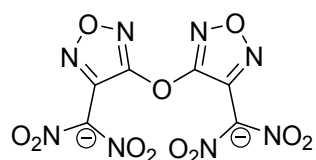

**Table S8.** Geometry coordinates of oxy-bridged bis(dinitromethyl)furazan anion.

|   |             |             |             |
|---|-------------|-------------|-------------|
| O | 2.26116500  | 2.53437400  | 1.55649100  |
| C | 1.05729700  | 1.12729900  | 0.52088100  |
| C | 2.41752900  | 0.65082500  | 0.52192300  |
| O | -2.26169000 | 2.53472000  | -1.55585000 |
| C | -2.41764600 | 0.65087700  | -0.52174600 |
| C | -1.05743000 | 1.12739400  | -0.52103900 |
| N | -0.96858200 | 2.26195700  | -1.15184600 |
| N | -3.13319100 | 1.53953300  | -1.16360200 |
| N | 0.96818000  | 2.26168000  | 1.15197200  |
| N | 3.13282000  | 1.53932000  | 1.16427800  |
| O | 0.00005700  | 0.45089600  | -0.00038500 |
| C | 3.01205700  | -0.55974800 | -0.05684700 |
| C | -3.01193400 | -0.55991700 | 0.05681600  |
| N | 3.23395300  | -1.65136700 | 0.78448100  |
| O | 2.78375900  | -1.53601800 | 1.95793900  |
| O | 3.83696700  | -2.67247800 | 0.40510600  |
| N | 3.38285900  | -0.51281100 | -1.39987200 |
| O | 3.09648500  | 0.56192400  | -2.00164300 |
| O | 3.95220200  | -1.45886700 | -1.97414800 |
| N | -3.23380400 | -1.65133700 | -0.78476900 |
| O | -2.78375400 | -1.53562200 | -1.95825200 |
| O | -3.83665000 | -2.67262100 | -0.40559200 |
| N | -3.38262200 | -0.51333200 | 1.39988300  |
| O | -3.95190400 | -1.45954200 | 1.97397700  |
| O | -3.09620500 | 0.56124800  | 2.00190300  |

**Table S9.** Ab Initio computational data.

| 结构 | $E_0$ (hartree) | $H_{\text{corr}}$ | ZPE | HOF <sup>Exp</sup> (kJ/mol) | HOF <sup>Calcd</sup> (kJ/mol) |
|----|-----------------|-------------------|-----|-----------------------------|-------------------------------|
|----|-----------------|-------------------|-----|-----------------------------|-------------------------------|

|                                                                                   |               |          |          |                     |                     |
|-----------------------------------------------------------------------------------|---------------|----------|----------|---------------------|---------------------|
| 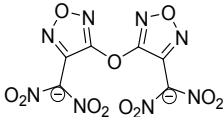 | -1490.9129728 | 0.137177 | 0.115531 | -                   | -11.3               |
|  | -1492.0131986 | 0.163808 | 0.141541 | -                   | 240.3               |
| CH <sub>4</sub>                                                                   | -40.397464    | 0.048605 | 0.044793 | -74.9 <sup>2</sup>  | -                   |
| CH <sub>3</sub> OCH <sub>3</sub>                                                  | -154.6771595  | 0.084916 | 0.079632 | -184.1 <sup>2</sup> | -                   |
|  | -261.5324524  | 0.050116 | 0.045698 | -                   | 196 <sup>3</sup>    |
|  | -448.1640608  | 0.046603 | 0.039724 | -                   | -222.8 <sup>3</sup> |
|  | -448.7003763  | 0.060215 | 0.052849 | -58.9 <sup>2</sup>  | -                   |
| CH <sub>3</sub> CH <sub>3</sub>                                                   | -79.6068548   | 0.079041 | 0.074611 | -84 <sup>2</sup>    | -                   |

## References:

1. M. J. Frisch, G. W. Trucks, H. B. Schlegel, G. E. Scuseria, M. A. Robb, J. R. Cheeseman, G. Scalmani, V. Barone, B. Mennucci, G. A. Petersson, H. Nakatsuji, M. Caricato, X. Li, H. P. Hratchian, A. F. Izmaylov, J. Bloino, G. Zheng, J. L. Sonnenberg, M. Hada, M. Ehara, K. Toyota, R. Fukuda, J. Hasegawa, M. Ishida, T. Nakajima, Y. Honda, O. Kitao, H. Nakai, T. Vreven, J. A. Montgomery, Jr., J. E. Peralta, F. Ogliaro, M. Bearpark, J. J. Heyd, E. Brothers, K. N. Kudin, V. N. Staroverov, R. Kobayashi, J. Normand, K. Raghavachari, A. Rendell, J. C. Burant, S. S. Iyengar, J. Tomasi, M. Cossi, N. Rega, J. M. Millam, M. Klene, J. E. Knox, J. B. Cross, V. Bakken, C. Adamo, J. Jaramillo, R. Gomperts, R. E. Stratmann, O. Yazyev, A. J. Austin, R. Cammi, C. Pomelli, J. W. Ochterski, R. L. Martin, K. Morokuma, V. G. Zakrzewski, G. A. Voth, P. Salvador, J. J. Dannenberg, S. Dapprich, A. D. Daniels, O. Farkas, J. B. Foresman, J. V. Ortiz, J. Cioslowski, D. J. Fox, *Gaussian 09, Revision B. 01*, Gaussian, Inc., Wallingford, CT, USA, 2009.
2. NIST Chemistry WebBook .
3. L. Liang, D. Cao, J. Song, H. Huang, K. Wang, C. Bian, X. Dong and Z. Zhou. *J. Mater. Chem. A*, 2013, **1**, 8857-8865.

## 3. <sup>1</sup>H and <sup>13</sup>C NMR spectra of compounds 2-9.

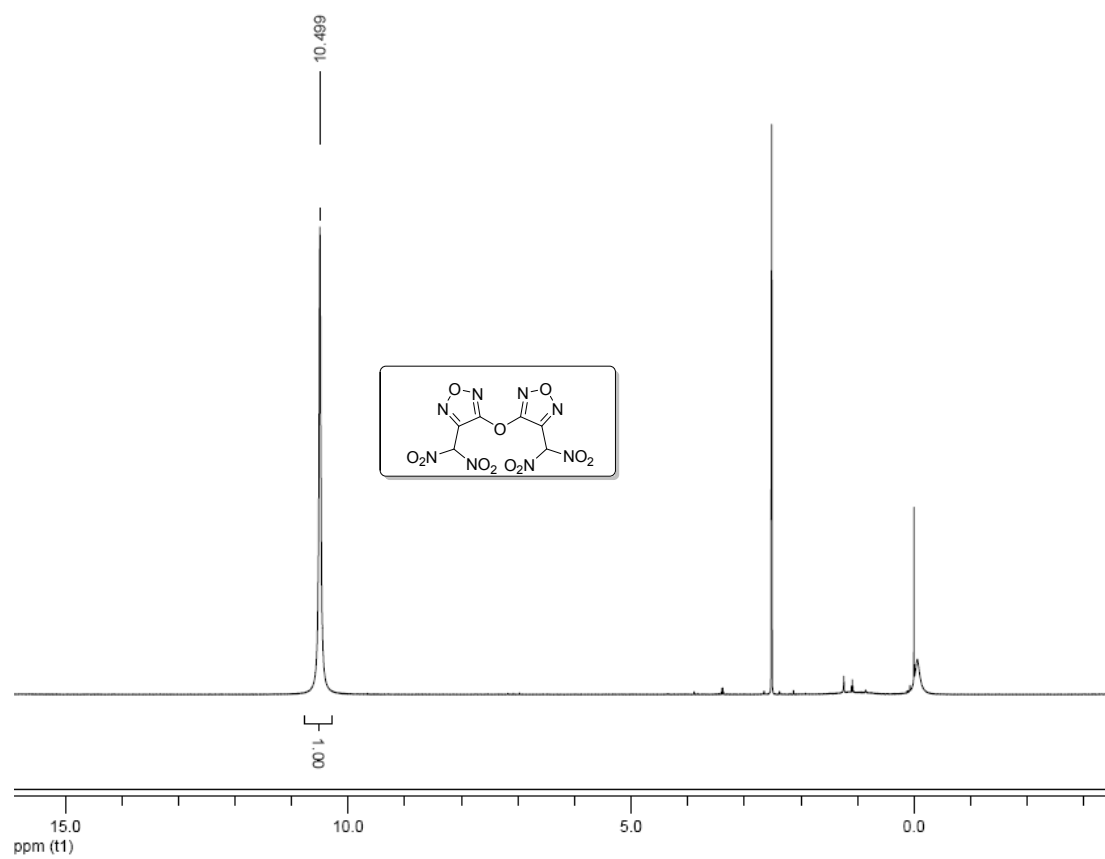

**Fig. S1**  $^1\text{H}$  NMR spectrum of **2** in  $\text{DMSO-}d_6$

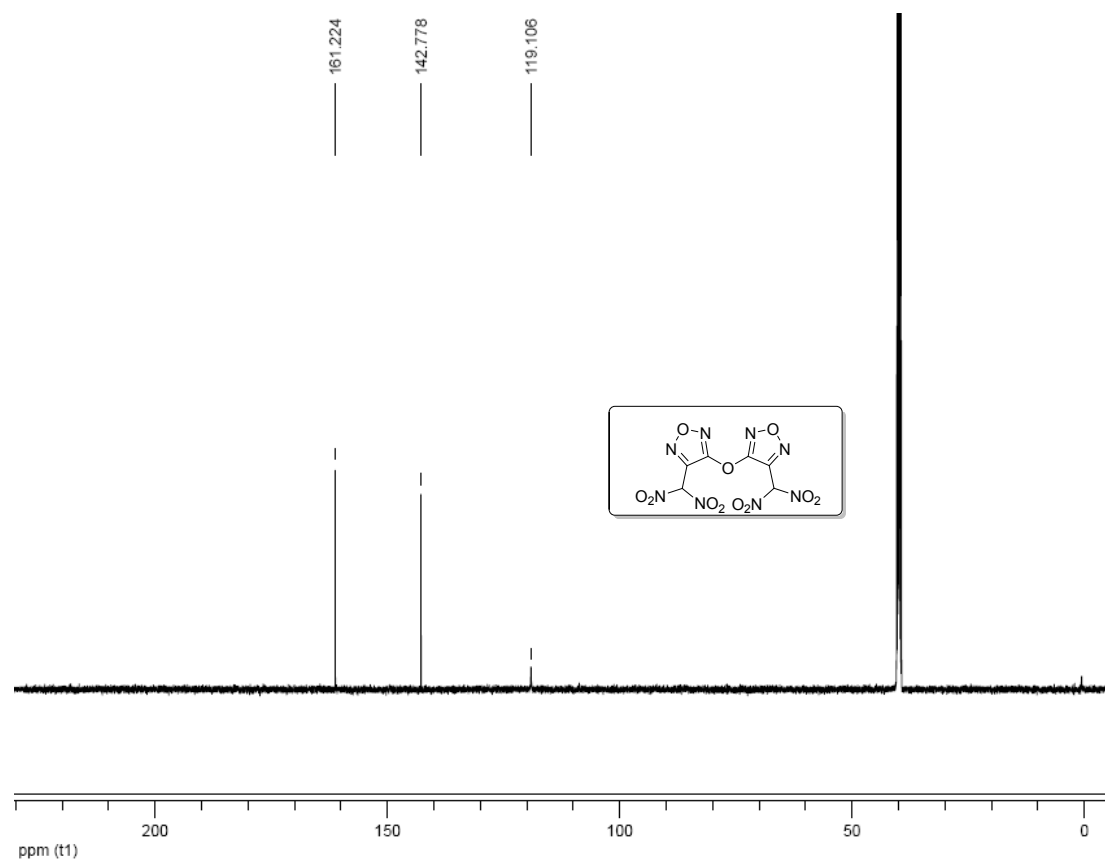

**Fig. S2**  $^{13}\text{C}$  NMR spectrum of **2** in  $\text{DMSO-}d_6$

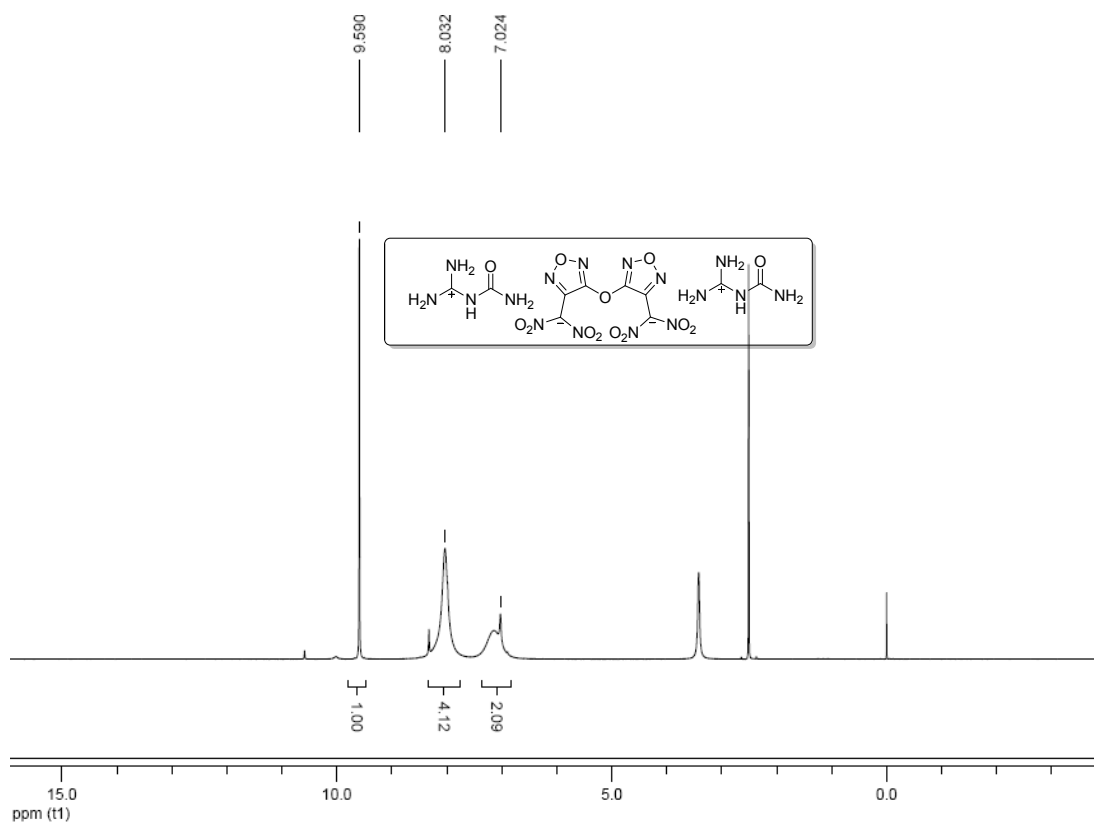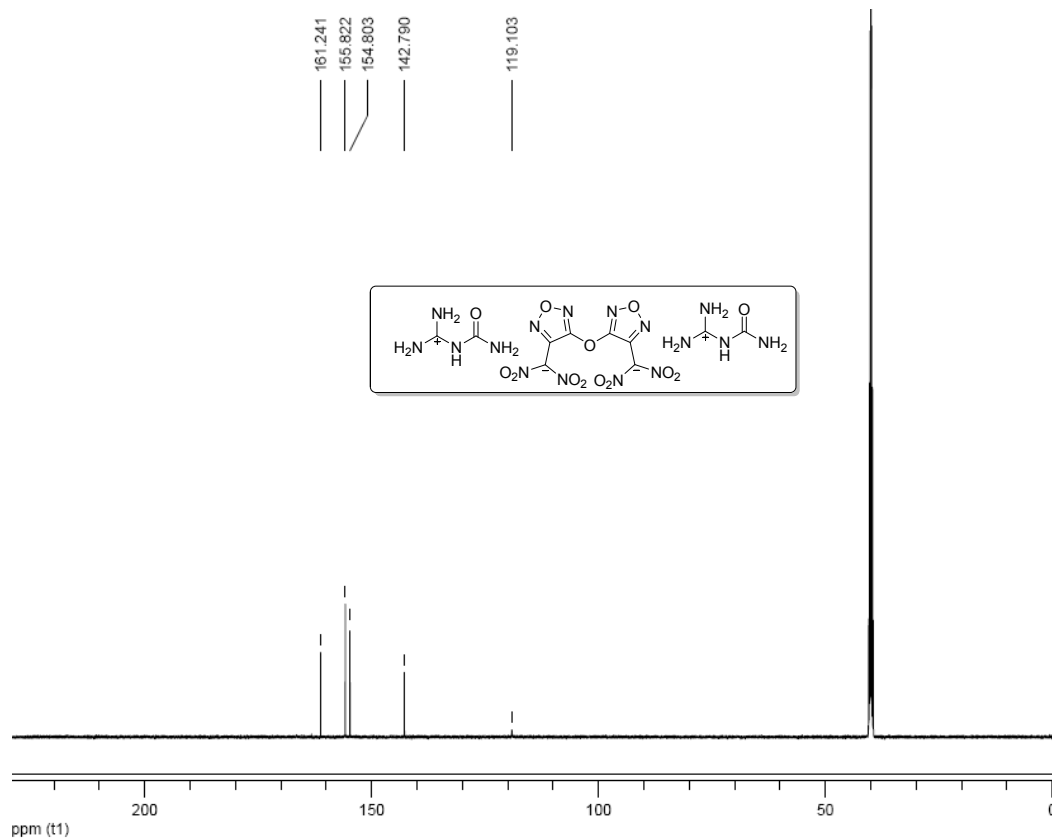

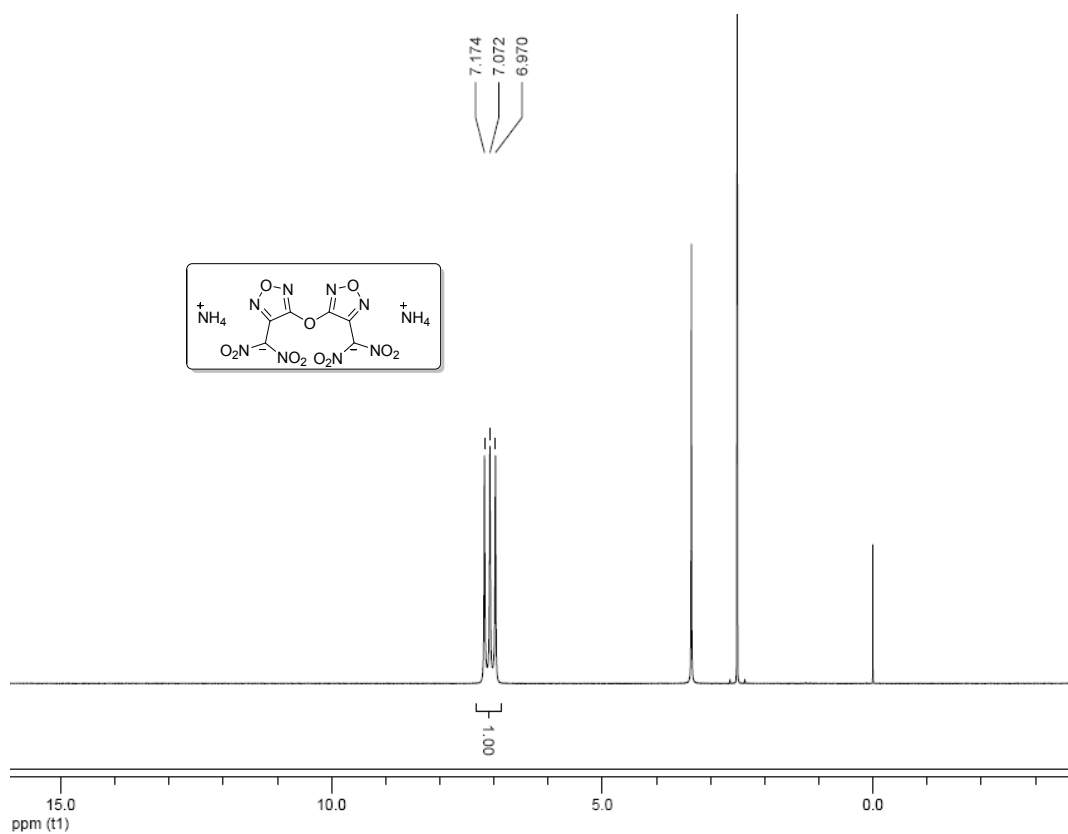

**Fig. S5**  $^1\text{H}$  NMR spectrum of **4** in  $\text{DMSO-}d_6$

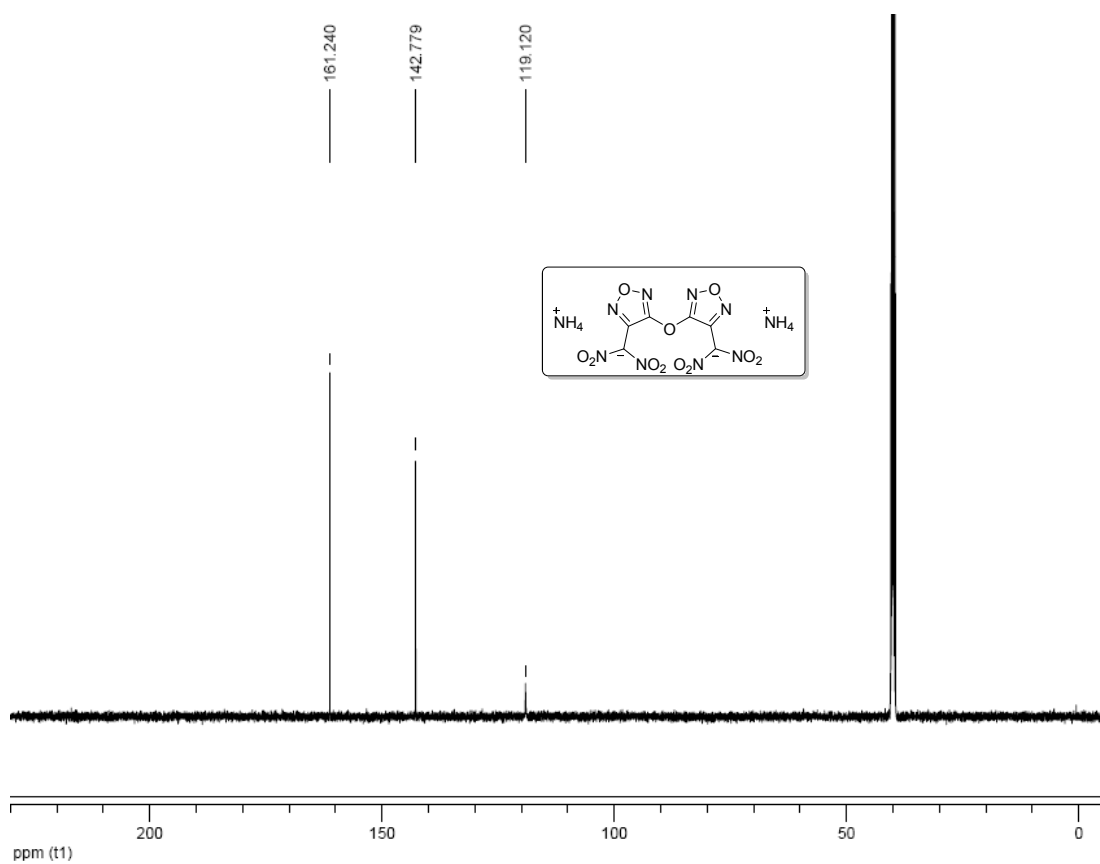

**Fig. S6**  $^{13}\text{C}$  NMR spectrum of **4** in  $\text{DMSO-}d_6$

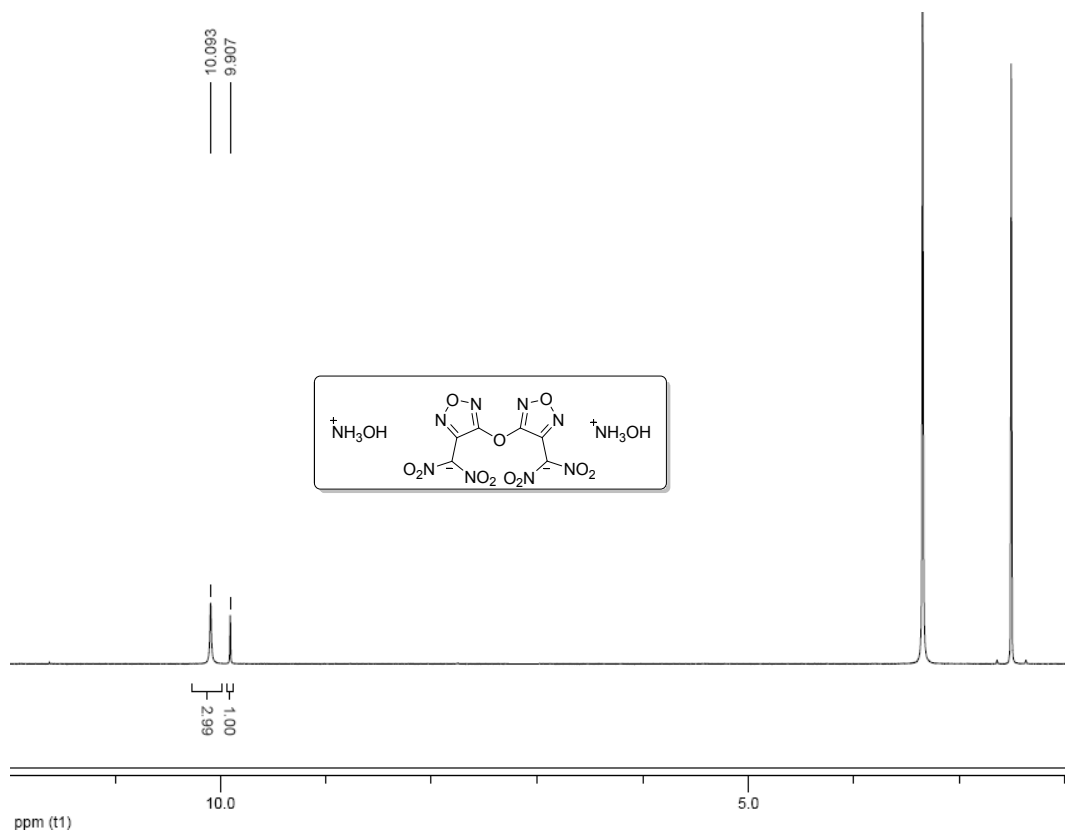

**Fig. S7**  $^1\text{H}$  NMR spectrum of **5** in  $\text{DMSO-}d_6$

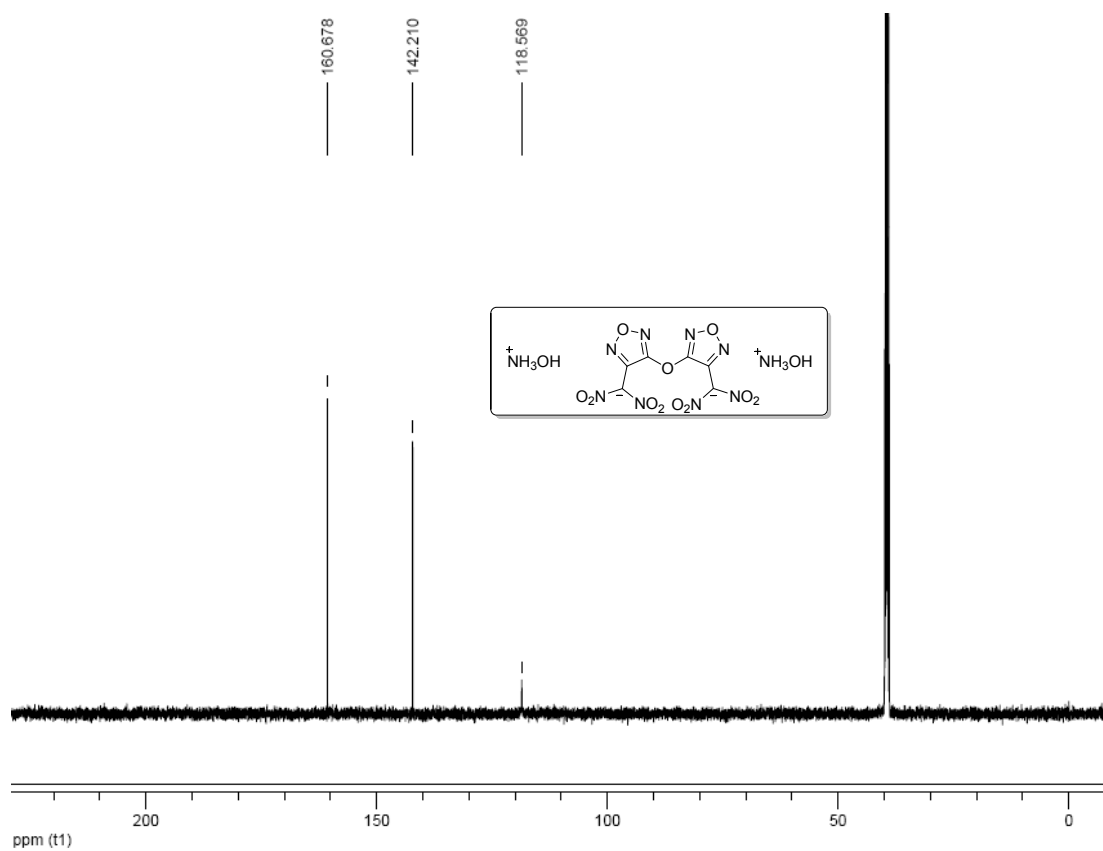

**Fig. S8**  $^{13}\text{C}$  NMR spectrum of **5** in  $\text{DMSO-}d_6$

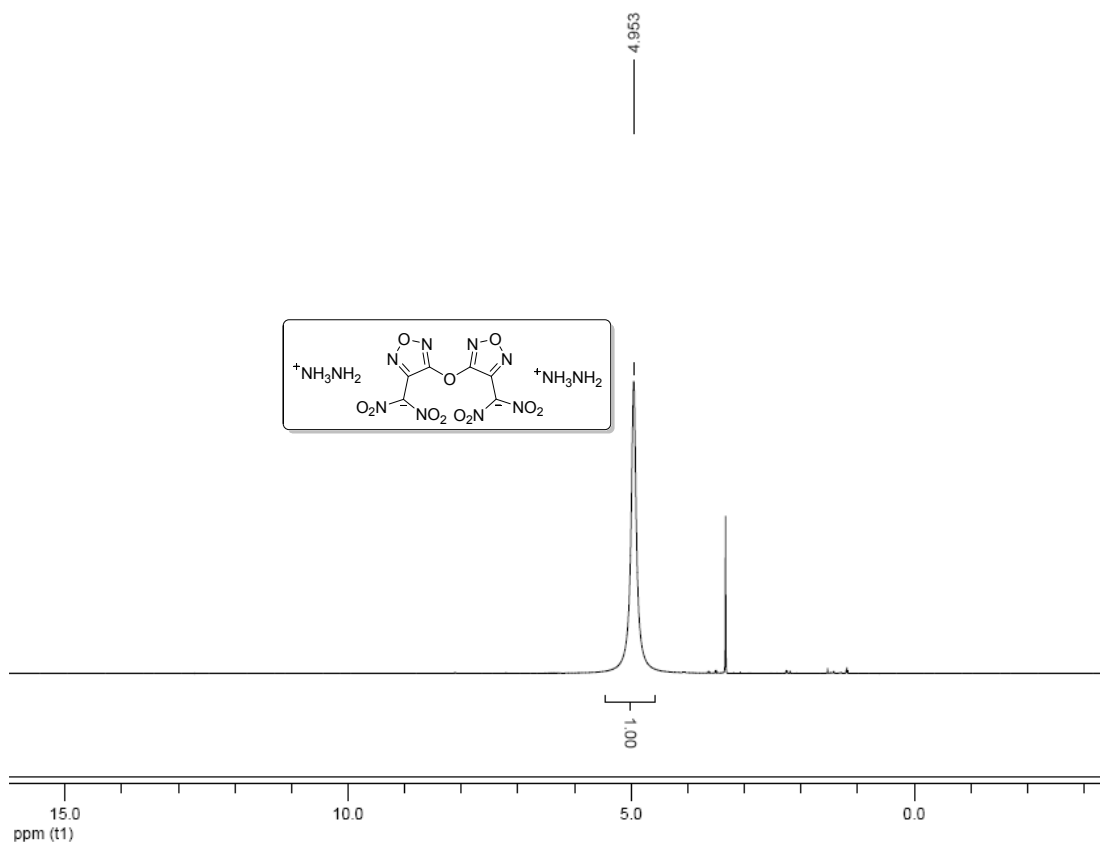

**Fig. S9**  $^1\text{H}$  NMR spectrum of **6** in  $\text{CD}_3\text{OD}$

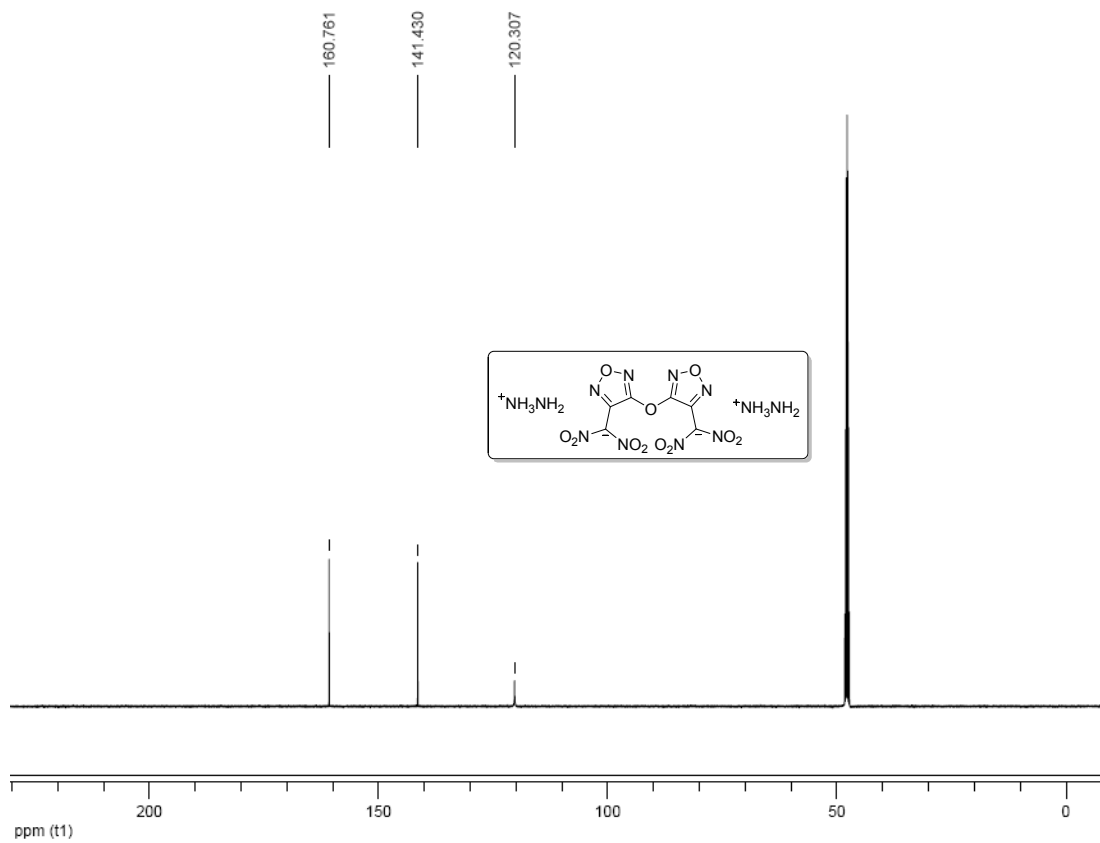

**Fig. S10**  $^{13}\text{C}$  NMR spectrum of **6** in  $\text{CD}_3\text{OD}$

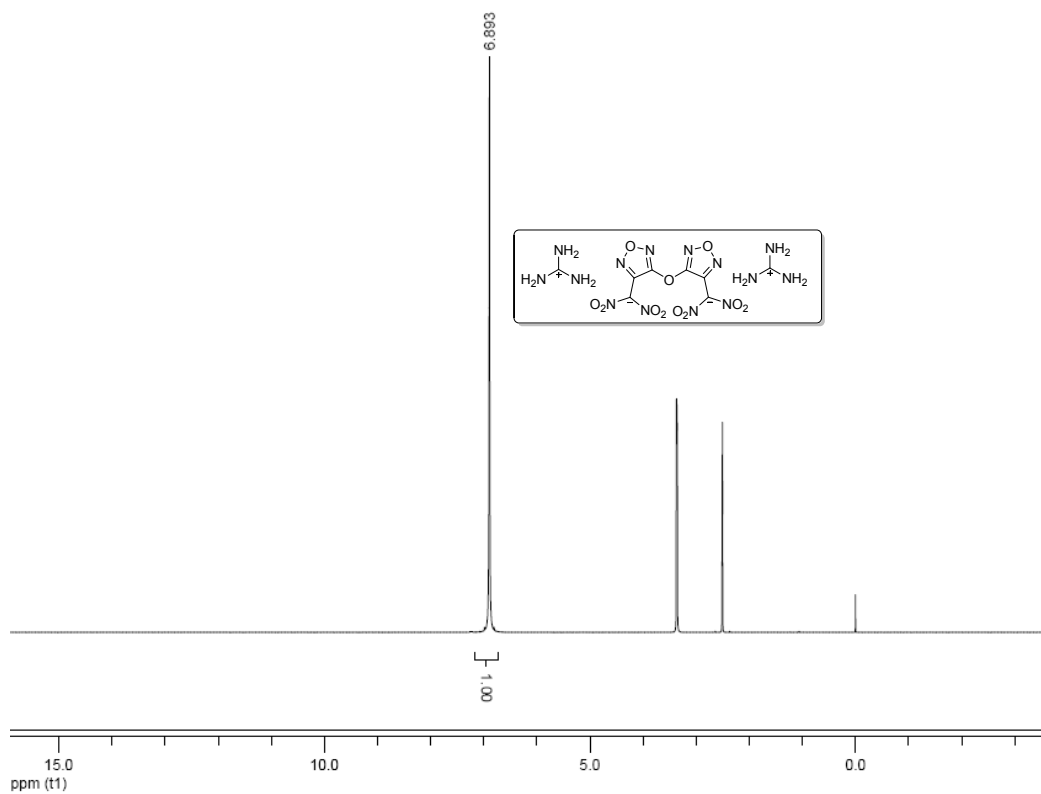

**Fig. S11**  $^1\text{H}$  NMR spectrum of **7** in  $\text{DMSO-}d_6$

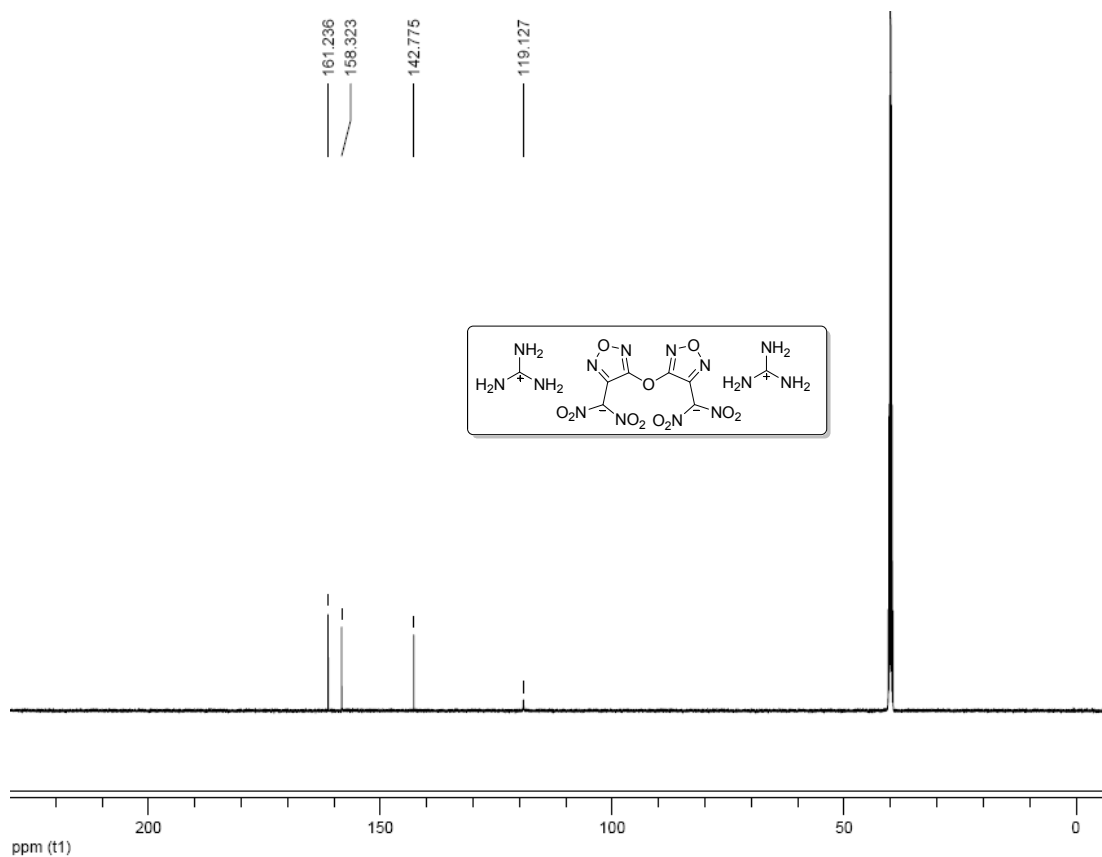

**Fig. S12**  $^{13}\text{C}$  NMR spectrum of **7** in  $\text{DMSO-}d_6$



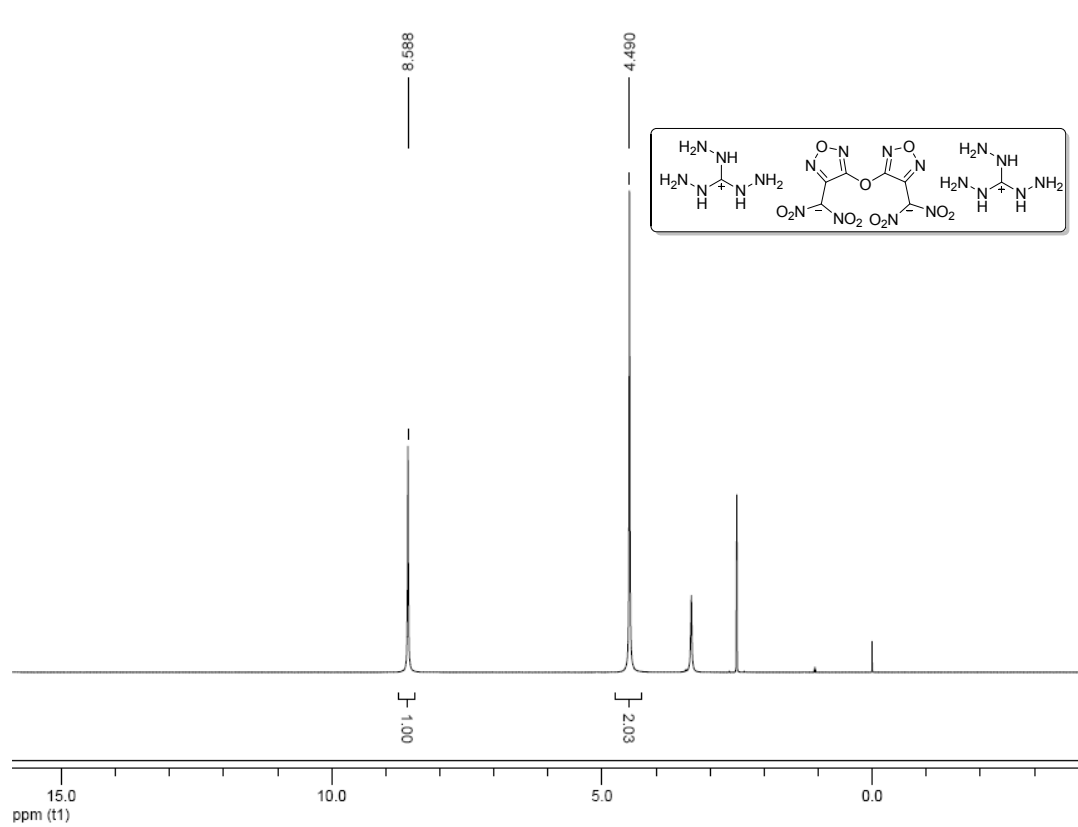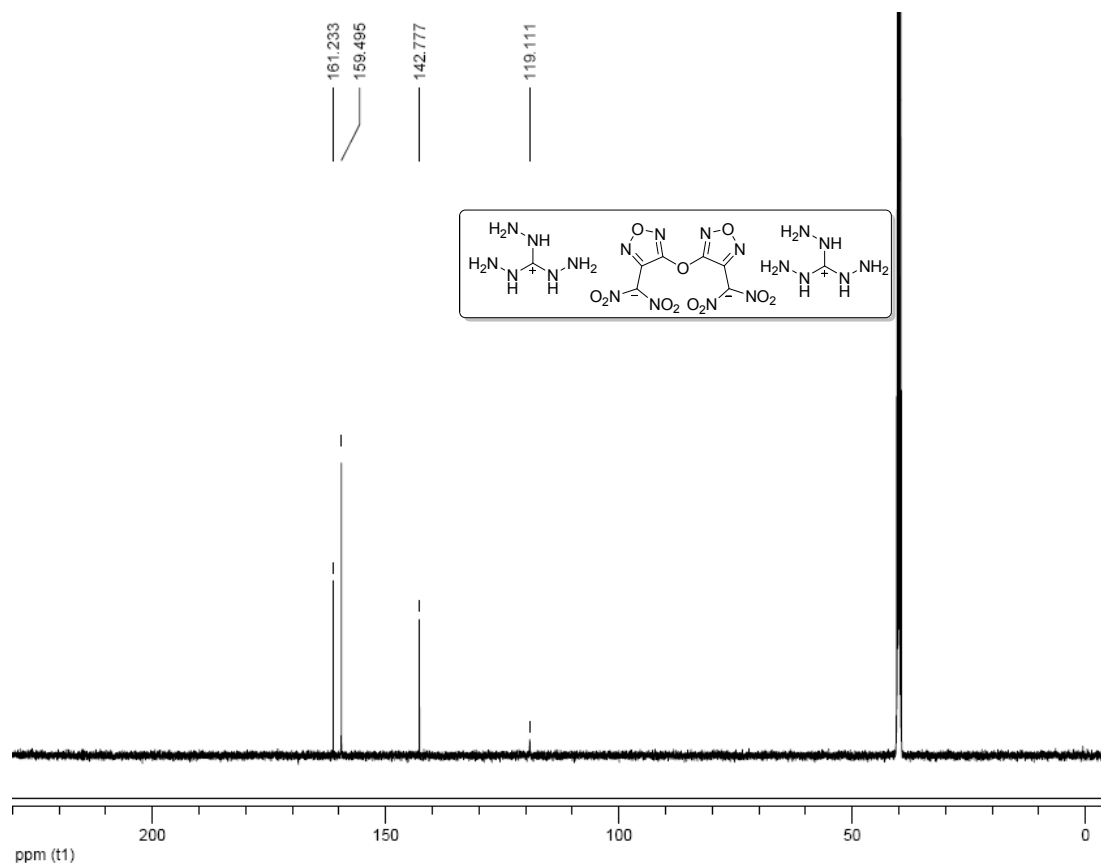

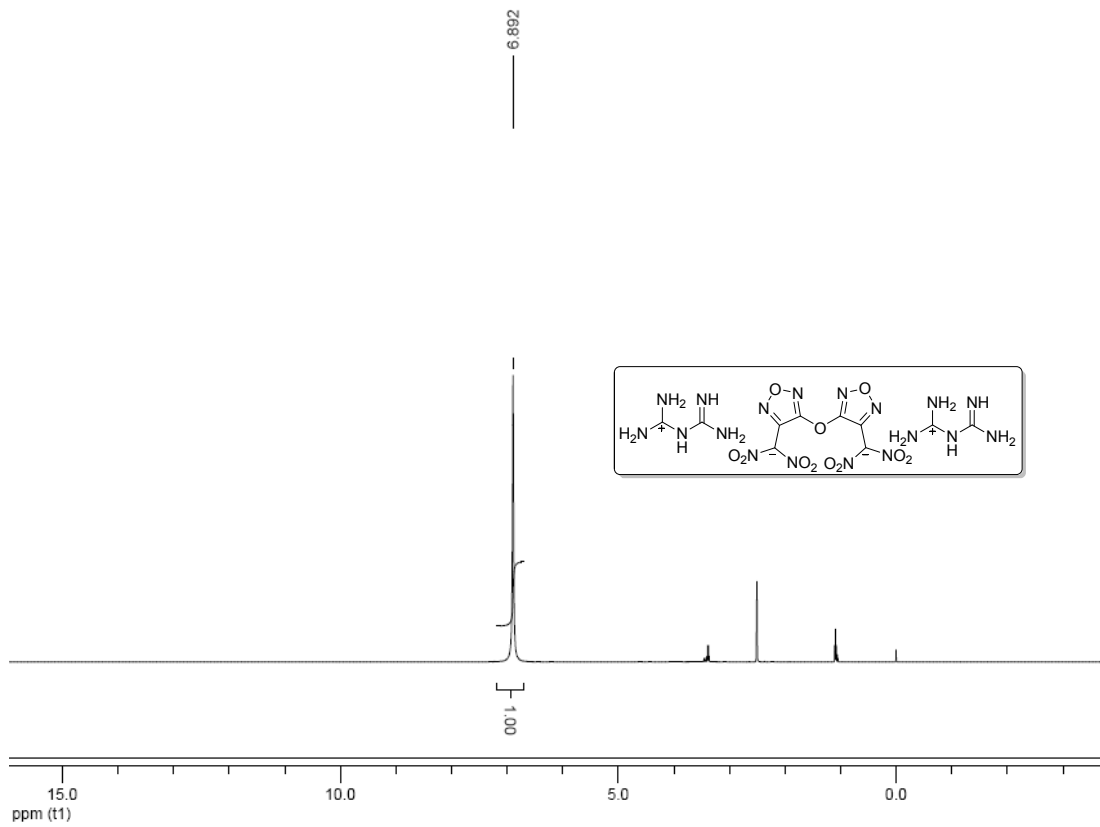

**Fig. S15**  $^1\text{H}$  NMR spectrum of **9** in  $\text{DMSO-}d_6$

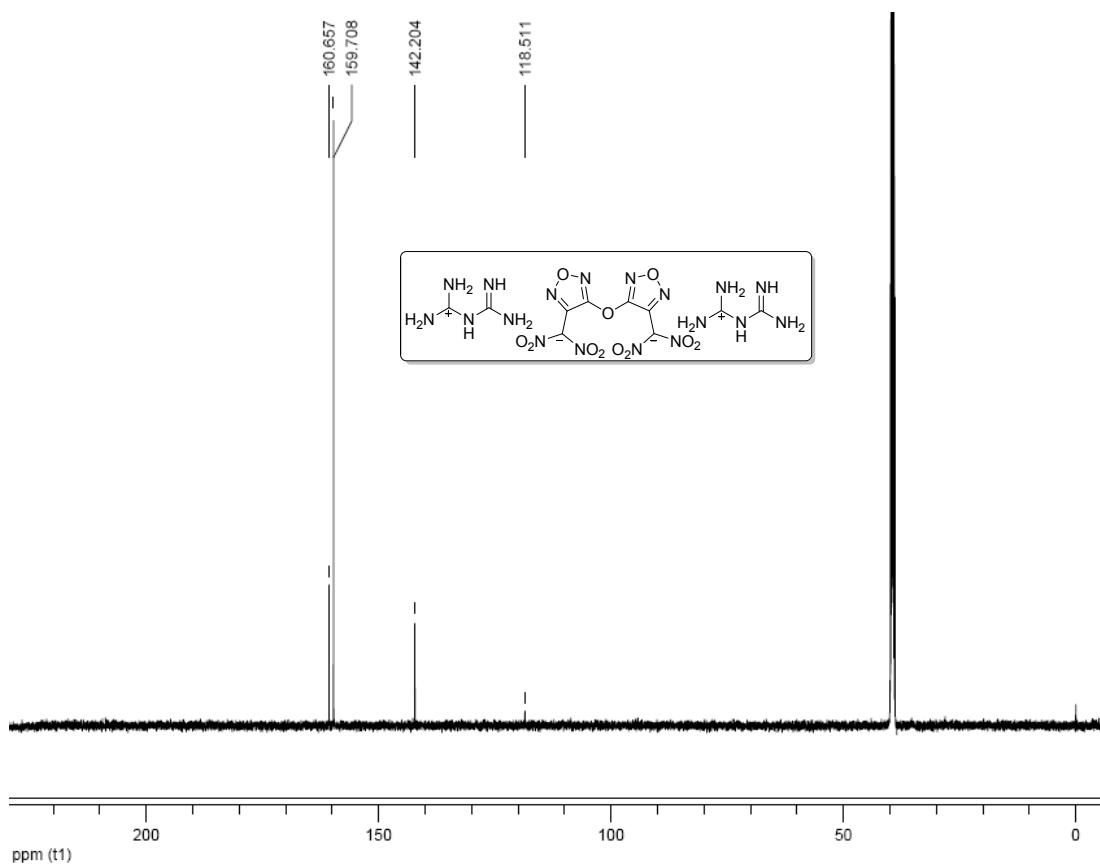

**Fig. S16**  $^{13}\text{C}$  NMR spectrum of **9** in  $\text{DMSO-}d_6$

#### 4. DSC curves of compounds 3-9

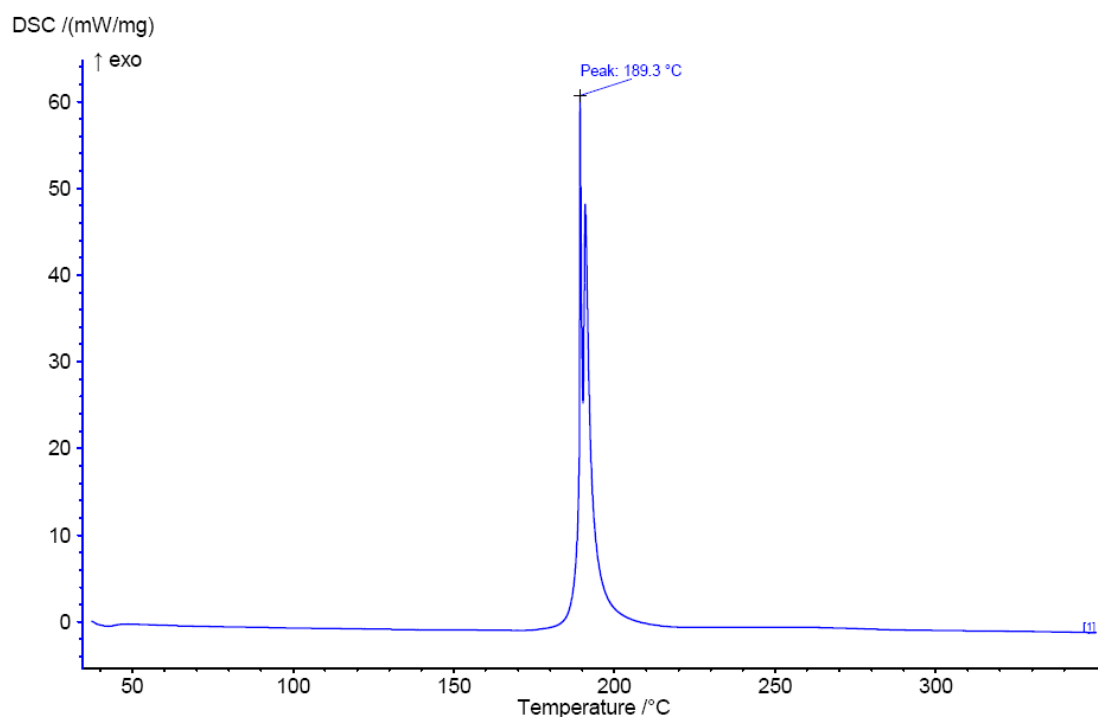

**Fig. S17** DSC curve of **3**

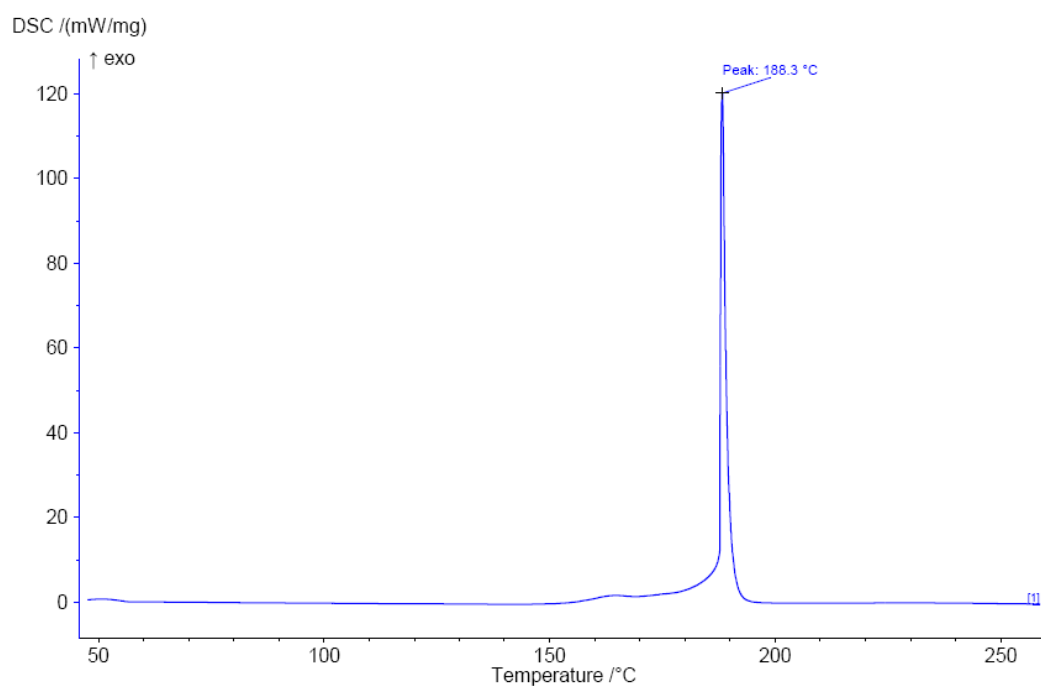

**Fig. S18** DSC curve of **4**

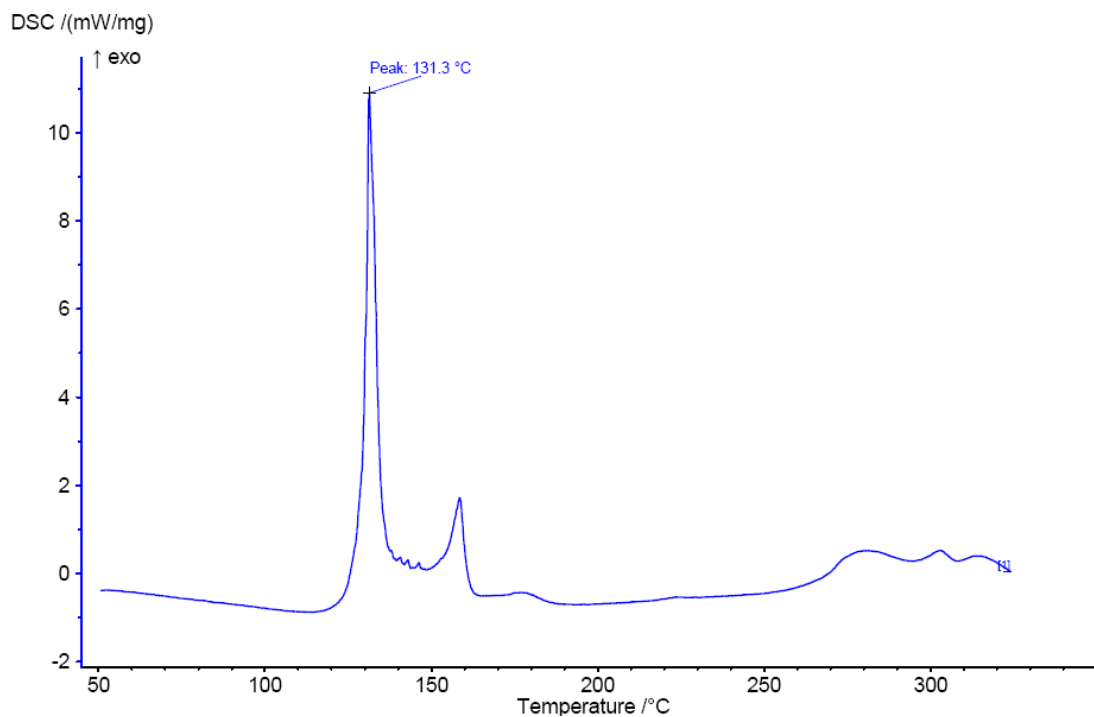

**Fig. S19** DSC curve of **5**

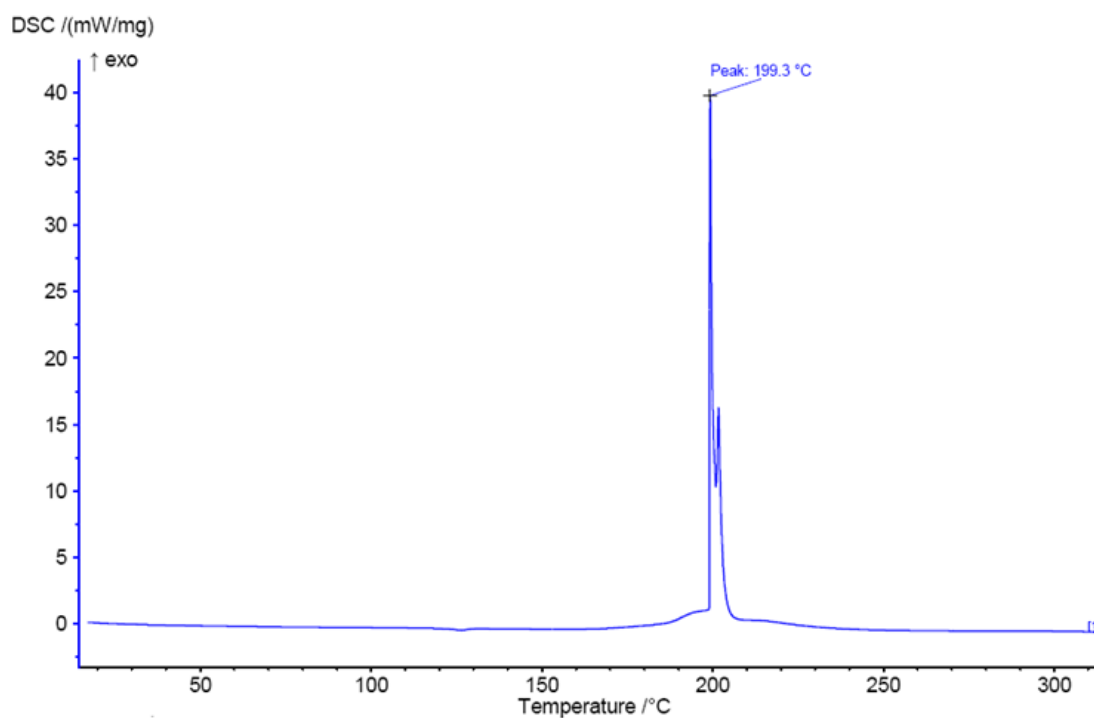

**Fig. S20** DSC curve of **6**

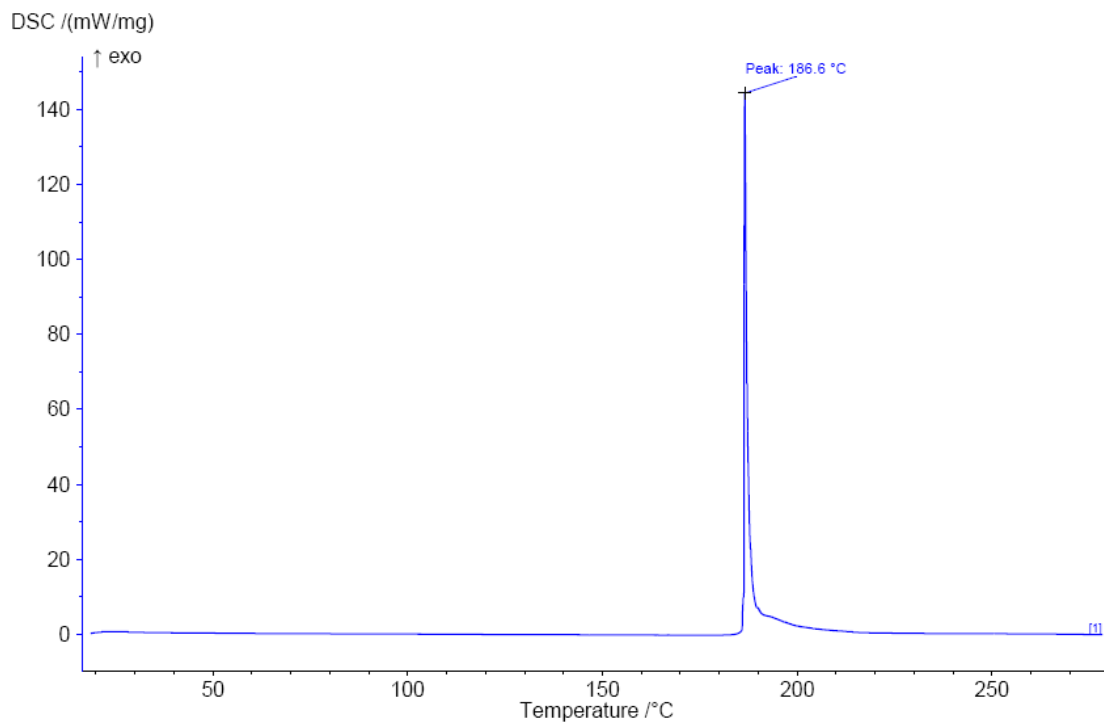

**Fig. S21** DSC curve of **7**

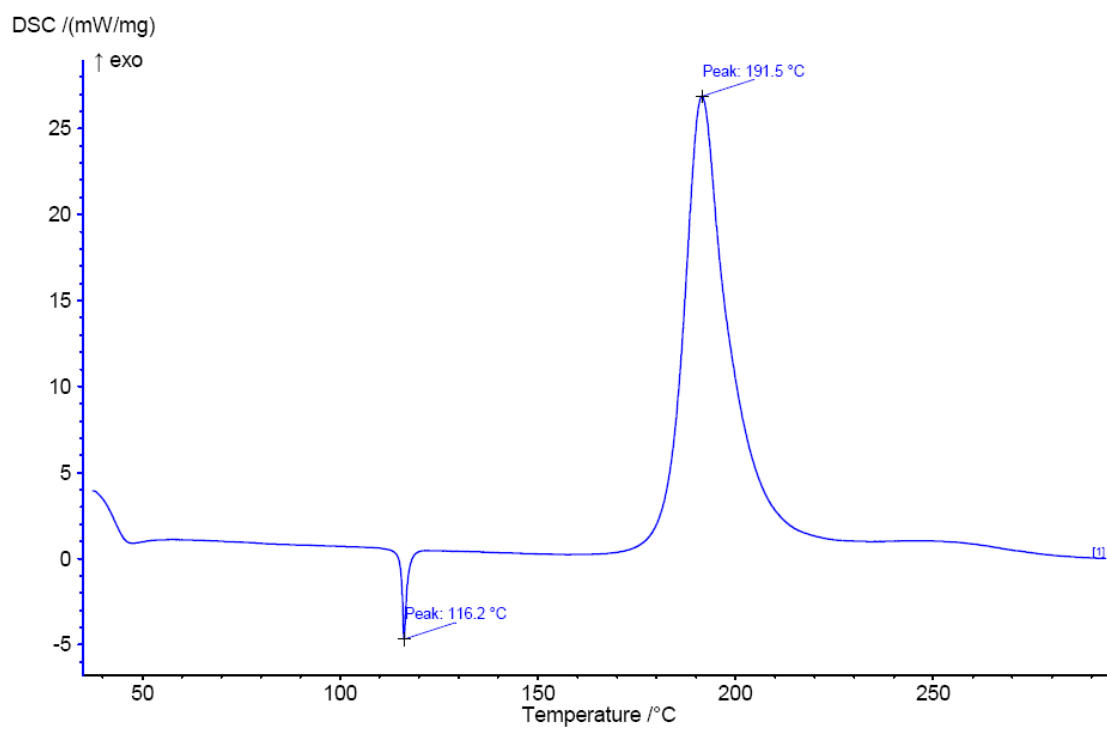

**Fig. S22** DSC curve of **8**

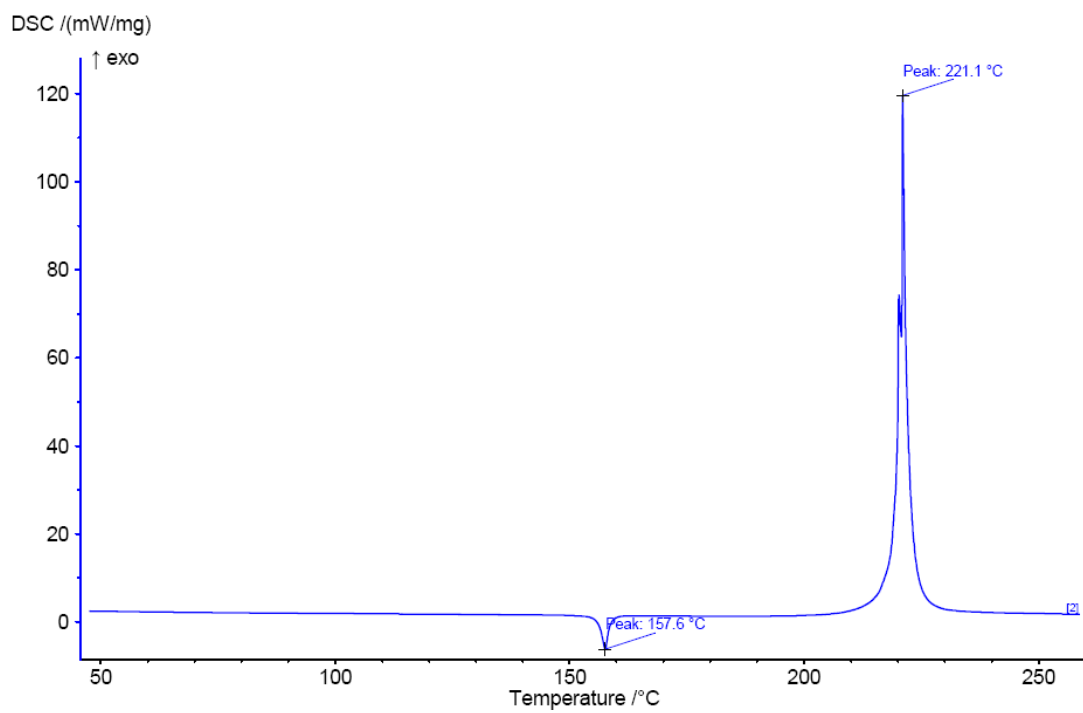

**Fig. S23** DSC curve of **9**.
